# Supplementary material for: Tumor break load quantitates structural variant-associated genomic instability with biological and clinical relevance across cancers
Source: Springer Nature journal article supplement (doi:10.1038/s41698-025-00922-9), 2025-05-14
Supplement: MOESM4 [file 41698_2025_922_MOESM4_ESM.pdf]

# Supplemental figures

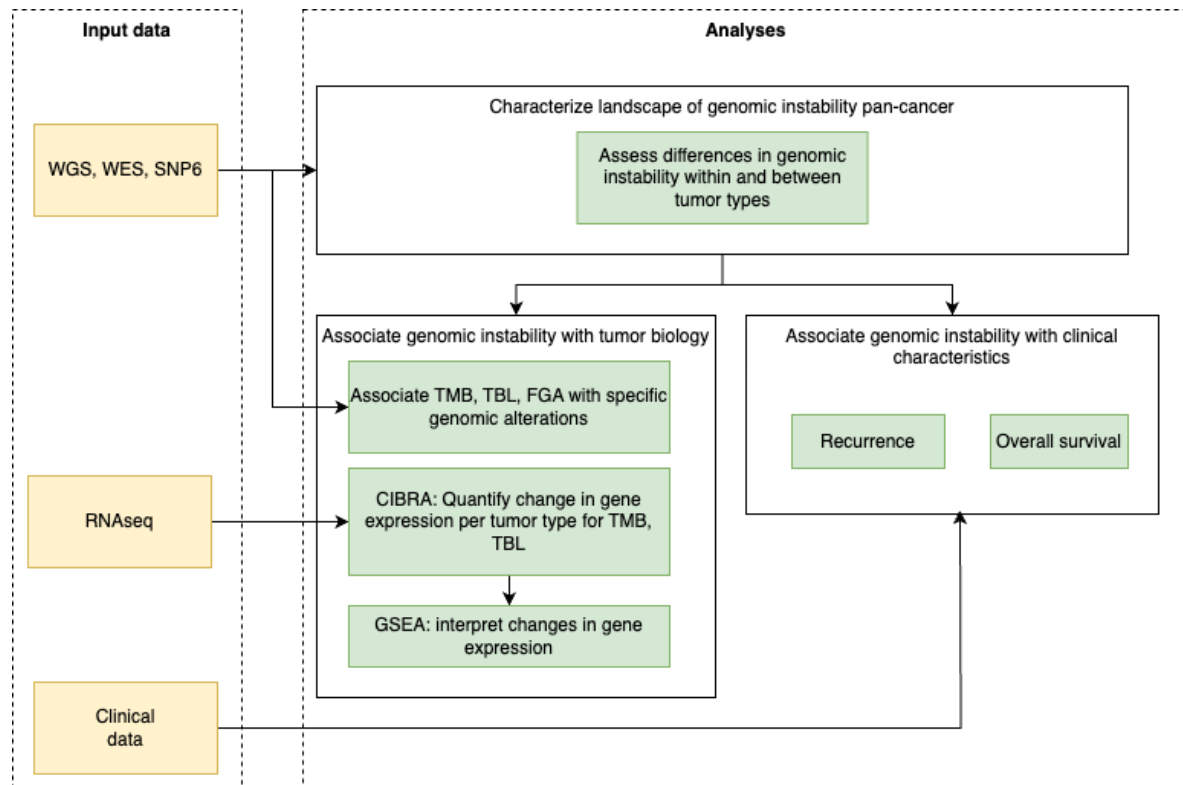

**Figure S1** Overview of the workflow used in this study with data from the TCGA, PCAWG and CCLE. First, we determined the value of different genomic instability measures (TMB, FGA, TBL) per sample, and characterized the landscape of genomic instability across different tumor types. Second, we evaluated the association of TBL (compared to TMB) with tumor biology, namely with specific genomic alterations and changes in gene expression (CIBRA, GSEA). Finally, we related differences in genomic instability measures to clinical characteristics.

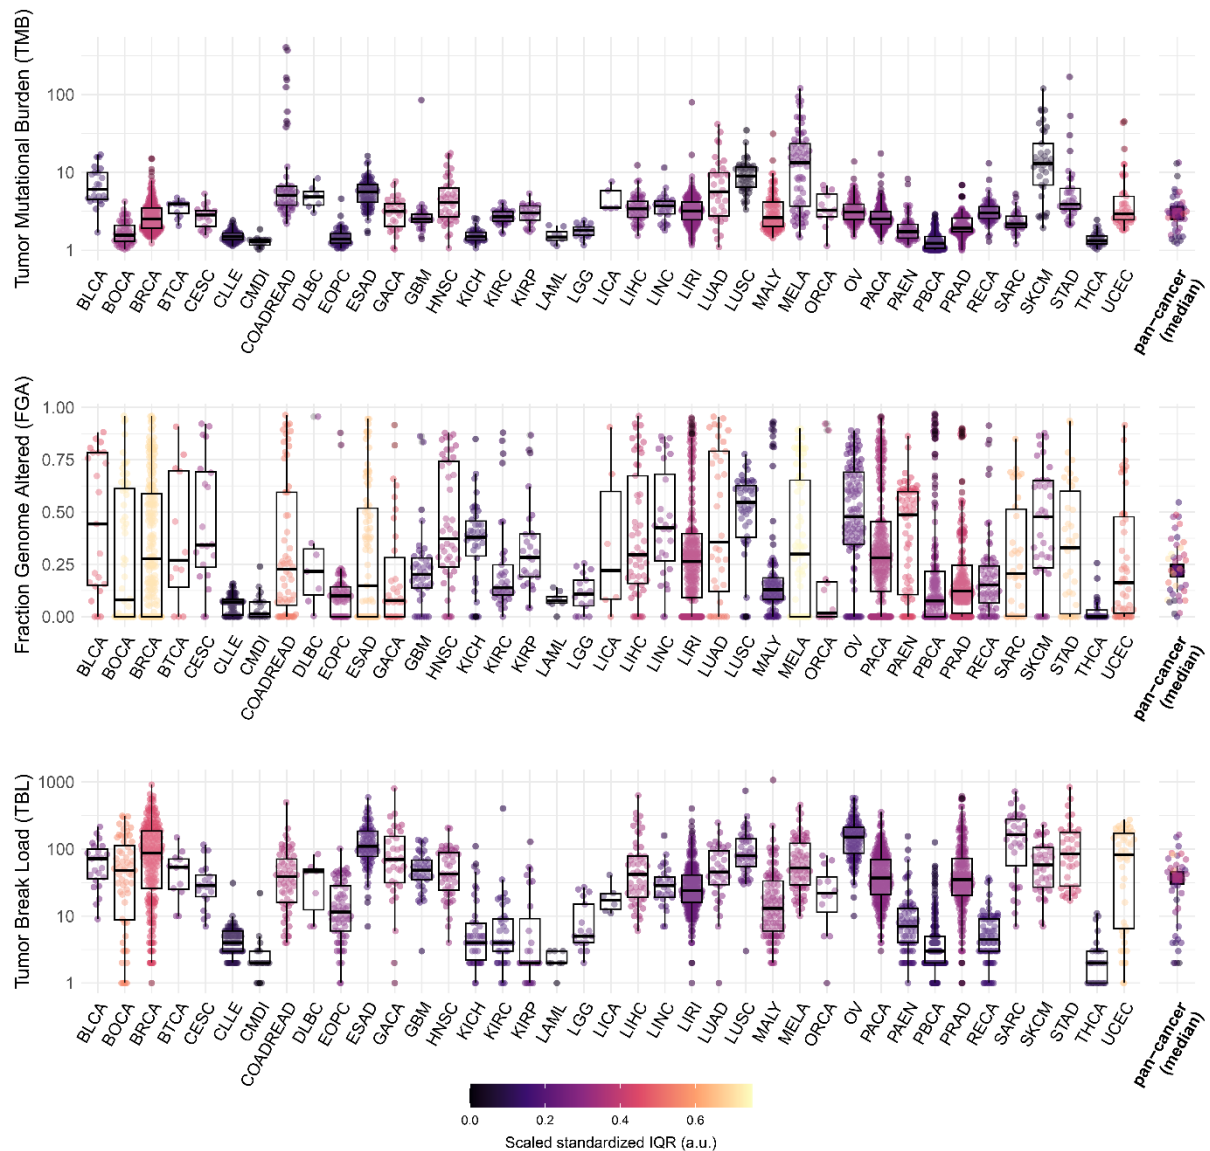

**Figure S2. High inter and intra variability in genomic instability measures in cancer.** Pan-cancer overview of tumor mutational burden (TMB), fraction genome altered (FGA), and tumor break load (TBL) in primary cancer (PCAWG). TMB and TBL are visualized on a log<sub>10</sub> scale. The color indicates the scaled standardized interquartile range (IQR) calculated from the ranked measures. The medians of all cancer types are reported as pan-cancer (median). BLCA: Bladder Urothelial Carcinoma, BOCA: Bone Cancer, BRCA: Breast invasive carcinoma, BTCA: Biliary tract cancer, CESC: Cervical squamous cell carcinoma and endocervical adenocarcinoma, CLLE: Chronic Lymphocytic Leukemia, CMDI: Chronic Myeloid Disorders, COADREAD: Colon and Rectum adenocarcinoma, DLBC: Lymphoid Neoplasm Diffuse Large B-cell Lymphoma, EOPC: Early Onset Prostate Cancer, ESAD: Esophageal Adenocarcinoma, GACA: Gastric Cancer, GBM: Glioblastoma multiforme, HNSC: Head and Neck squamous cell carcinoma, KICH: Kidney Chromophobe, KIRC: Kidney renal clear cell carcinoma, KIRP: Kidney renal papillary cell carcinoma, LAML: Acute Myeloid Leukemia, LGG: Brain Lower Grade Glioma, LICA: Liver Cancer, LIHC: Liver hepatocellular carcinoma, LINC: Liver Cancer, LIRI: Liver Cancer, LUAD: Lung adenocarcinoma, LUSC: Lung squamous cell carcinoma, MALY: Malignant Lymphoma, MELA: Melanoma, ORCA: Oral Cancer, OV: Ovarian serous cystadenocarcinoma, PACA: Pancreatic Cancer, PAEN: Pancreatic Cancer Endocrine neoplasms, PBCA: Pediatric Brain Cancer, PRAD: Prostate adenocarcinoma, RECA: Renal Cancer, SARC: Sarcoma, SKCM: Skin Cutaneous Melanoma, STAD: Stomach adenocarcinoma, THCA: Thyroid carcinoma, UCEC: Uterine Corpus Endometrial Carcinoma.

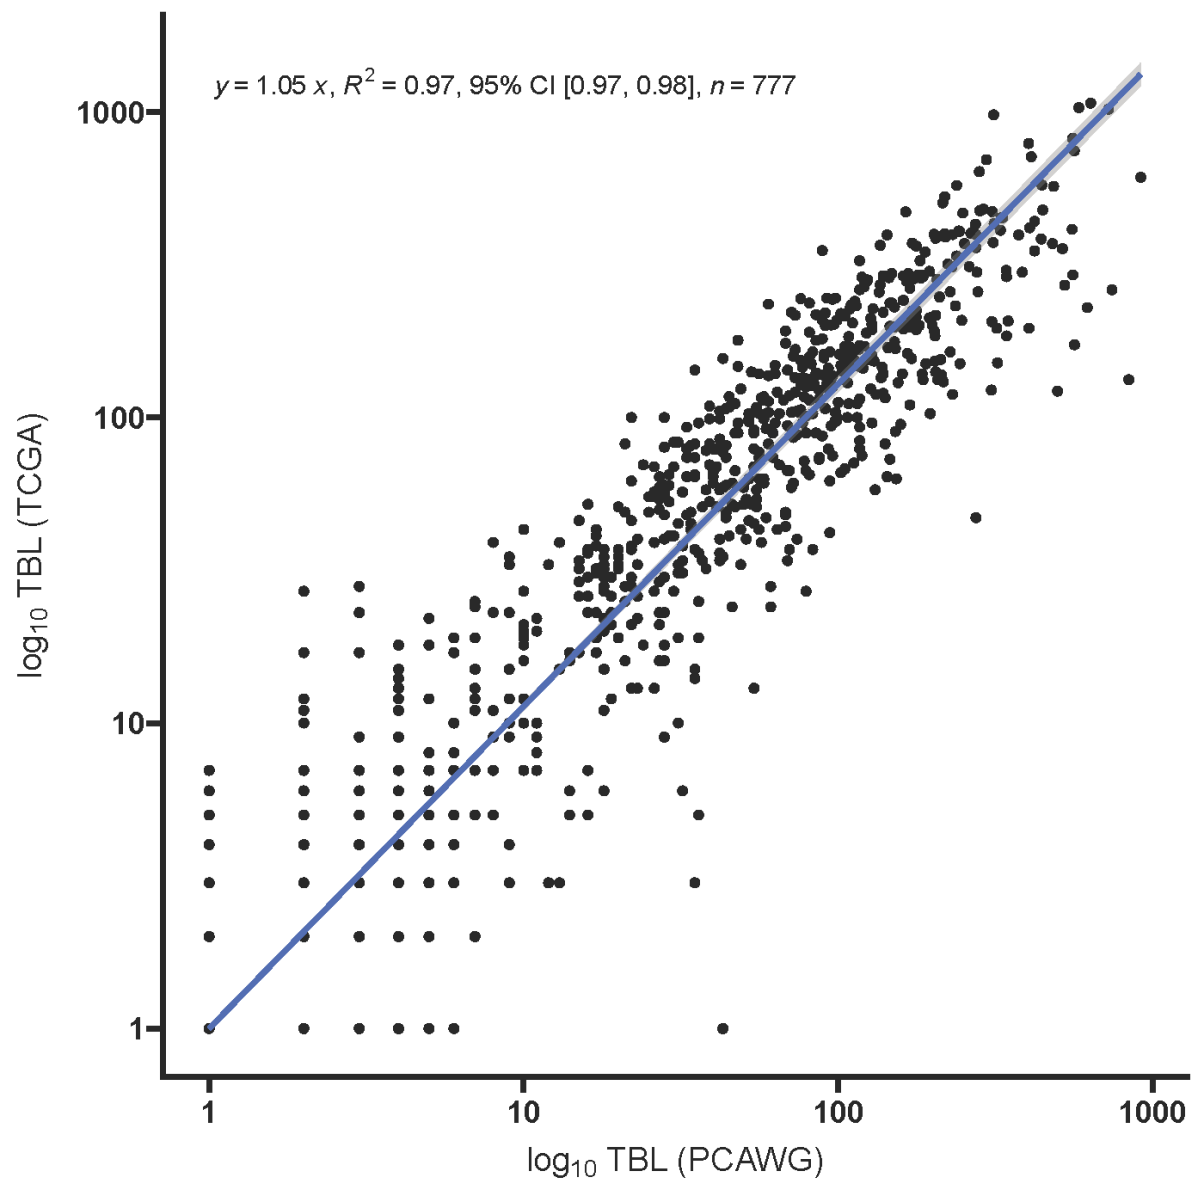

**Figure S3. High concordance between SNP6 data derived TBL and WGS data derived TBL.** Scatterplot of the  $\log_{10}$  TBL calculated for shared samples from SNP6 array data from the TCGA and WGS data from the PCWAG. Regression line ( $\log_{10}$  TBL (TCGA) = 1.05  $\log_{10}$  TBL (PCAWG)) with the Pearson's correlation coefficient ( $R^2$ ) reported with its 95% confidence interval (CI).

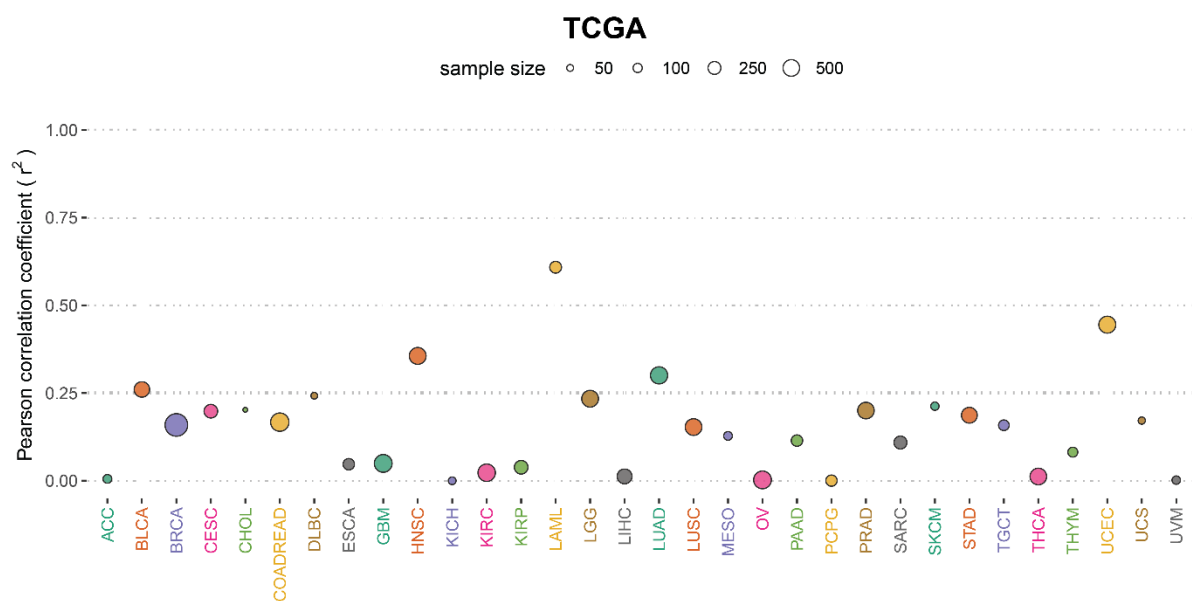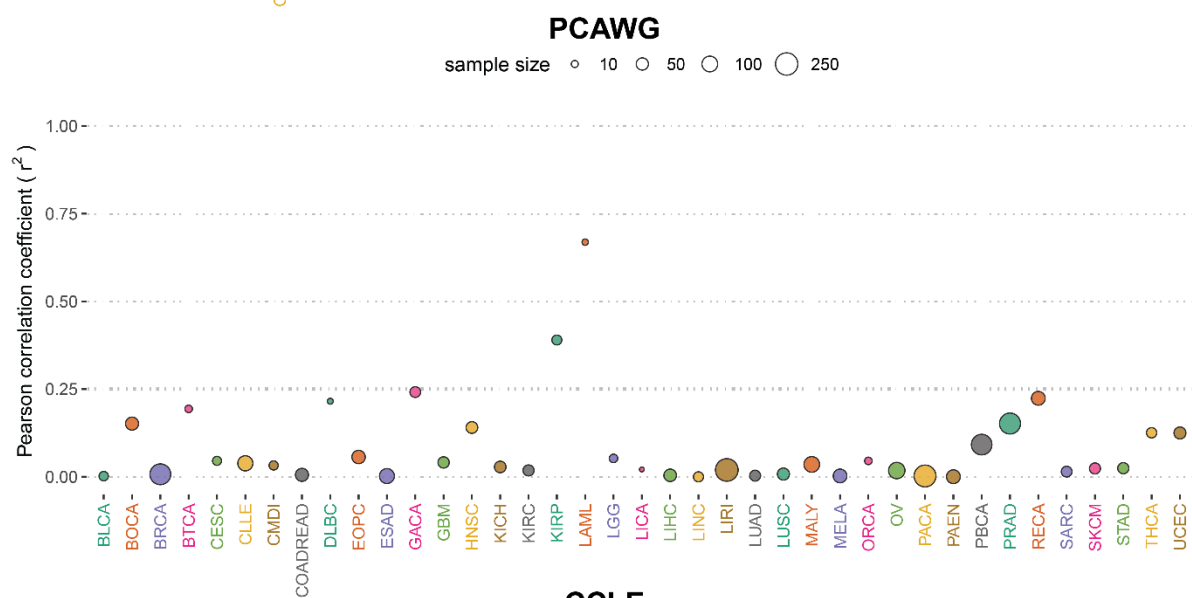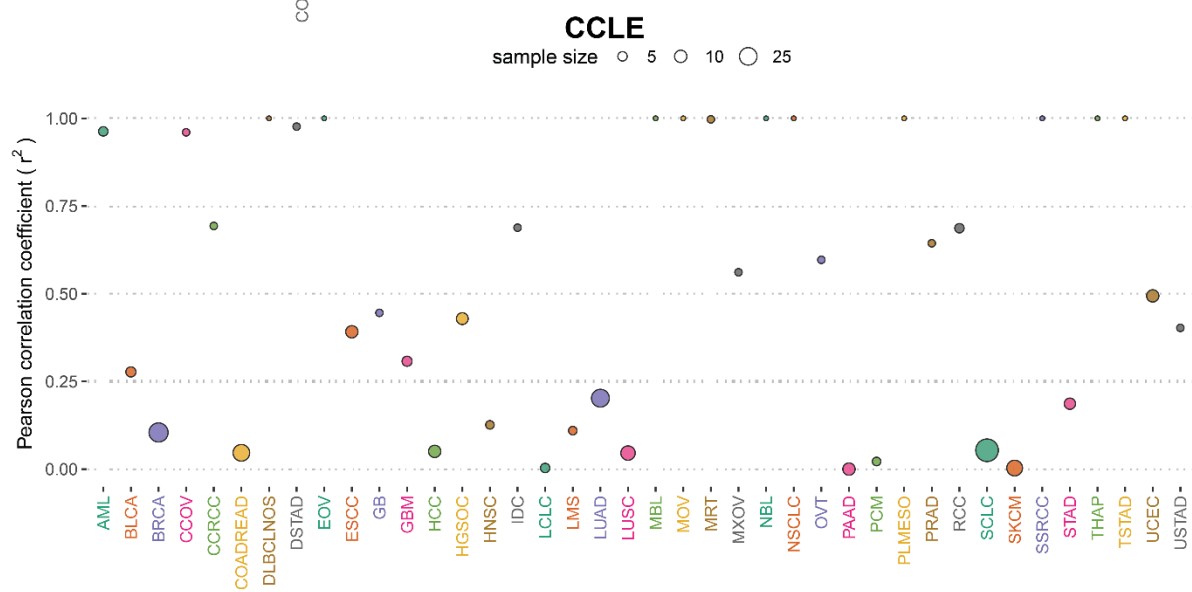

**Figure S4. TBL and FGA are distinct features of genomic instability in primary cancer.** Pan-cancer overview of the correlation between TBL and FGA reported with Pearson's correlation coefficient ( $r^2$ ) for primary cancer data (PCAWG and TCGA) and cell lines (CCLE). The size of the dot indicates the sample size. Color marks the type of cancer. Tumor type abbreviations from the CCLE cell lines were retrieved from [OncoTree](#). ACC: Acute Myeloid Leukemia, BLCA: Bladder Urothelial Carcinoma, BRCA: Breast invasive carcinoma, CESC: Cervical squamous cell carcinoma and endocervical adenocarcinoma, CHOL: Cholangiocarcinoma, COADREAD: Colon and Rectum adenocarcinoma, DLBC: Lymphoid Neoplasm Diffuse Large B-cell Lymphoma, ESCA: Esophageal carcinoma, GBM: Glioblastoma multiforme, HNSC: Head and Neck squamous cell carcinoma, KICH: Kidney Chromophobe, KIRC: Kidney renal clear cell carcinoma, KIRP: Kidney renal papillary cell carcinoma, LAML: Acute Myeloid Leukemia, LGG: Brain Lower Grade Glioma, LIHC: Liver hepatocellular carcinoma, LUAD: Lung adenocarcinoma, LUSC: Lung squamous cell carcinoma, MESO: Mesothelioma, OV: Ovarian serous cystadenocarcinoma, PAAD: Pancreatic adenocarcinoma, PCPG: Pheochromocytoma and Paraganglioma, PRAD: Prostate adenocarcinoma, SARC: Sarcoma, SKCM: Skin Cutaneous Melanoma, STAD: Stomach adenocarcinoma, TGCT: Testicular Germ Cell Tumors, THCA: Thyroid carcinoma, THYM: Thymoma, UCEC: Uterine Corpus Endometrial Carcinoma, UCS: Uterine Carcinosarcoma, UVM: Uveal Melanoma. BLCA: Bladder Urothelial Carcinoma, BOCA: Bone Cancer, BTCA: Biliary tract cancer, CLLE: Chronic Lymphocytic Leukemia, CMDI: Chronic Myeloid Disorders, DLBC: Lymphoid Neoplasm Diffuse Large B-cell Lymphoma, EOPC: Early Onset Prostate Cancer, ESAD: Esophageal Adenocarcinoma, GACA: Gastric Cancer, KICH: Kidney Chromophobe, LICA: Liver Cancer, LINC: Liver Cancer, LIRI: Liver Cancer, MALY: Malignant Lymphoma, MELA: Melanoma, ORCA: Oral Cancer OV: Ovarian serous cystadenocarcinoma, PACA: Pancreatic Cancer, PAEN: Pancreatic Cancer Endocrine neoplasms, PBCA: Pediatric Brain Cancer, RECA: Renal Cancer, UCEC: Uterine Corpus Endometrial Carcinoma.

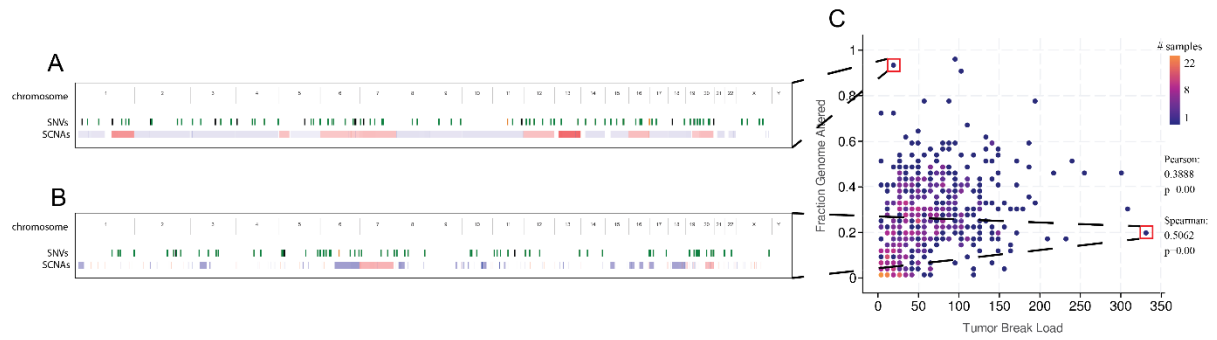

**Figure S5.** cBioPortal visualization of molecular profiles of patients with a high fraction genome altered (FGA) and low tumor break load (TBL) (A) or low FGA and high TBL (B) selected from the study view of TCGA-COADREAD depicting the tumor break load against the fraction genome altered (C). The molecular profile shows a genome-wide view of the single nucleotide variants (SNV) in green and the somatic copy number aberrations (SCNA) in blue (loss) or red (gain). The color in the scatterplot indicates the sample density. The correlation between the TBL and FGA has been reported with the Pearson and Spearman correlation coefficients.

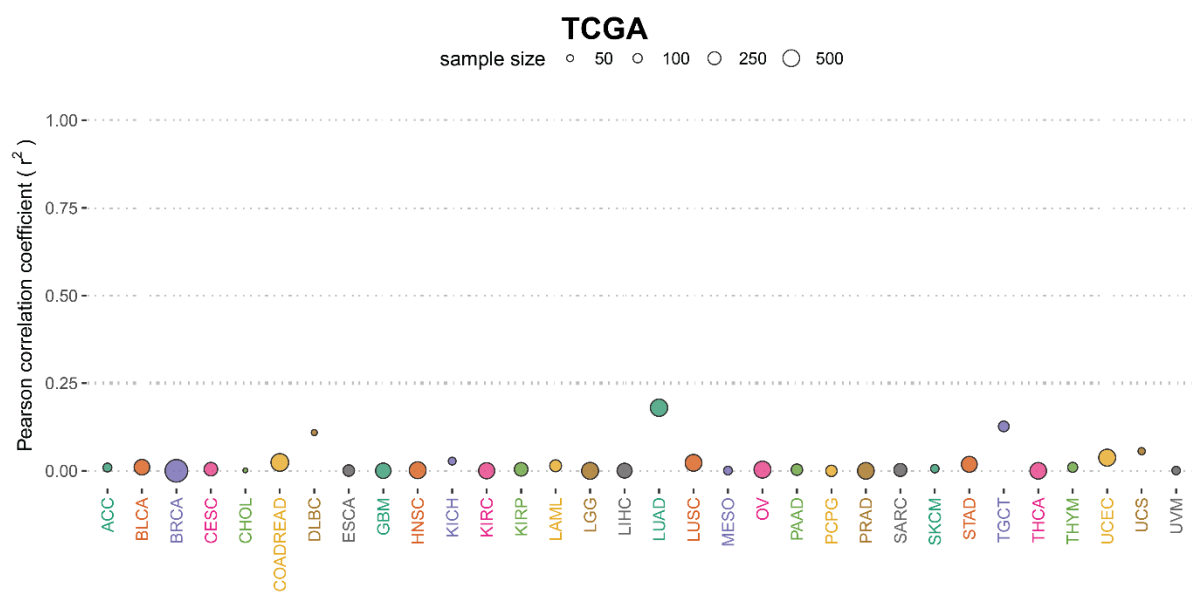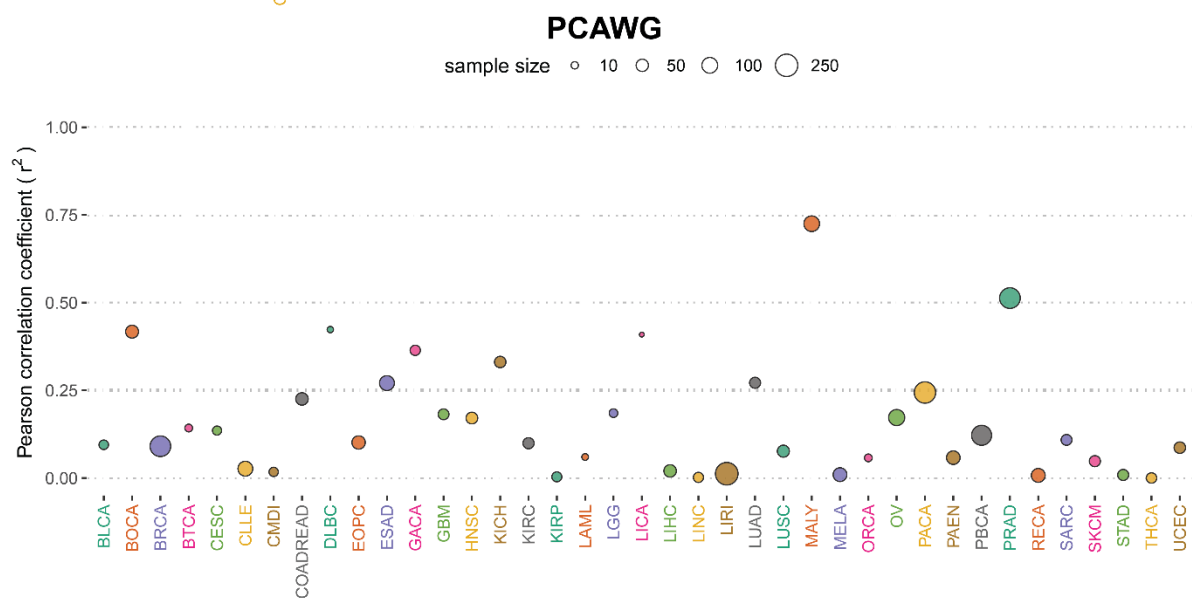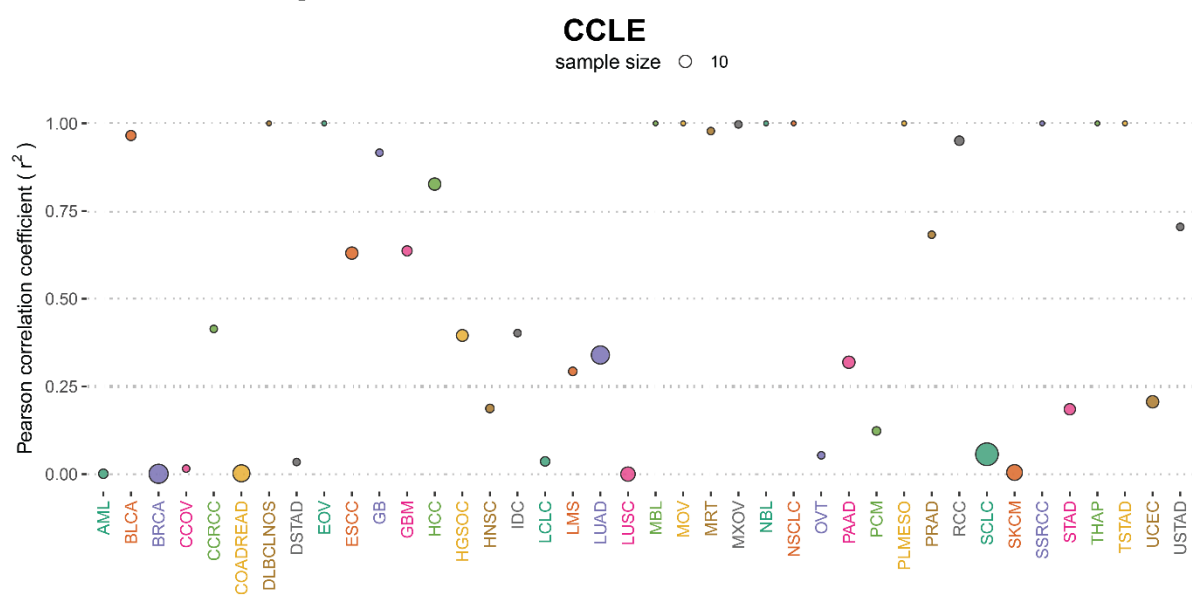

**Figure S6. TBL and TMB are poorly correlated in most cancer types.** Pan-cancer overview of the correlation between the TBL and the TMB reported with the Pearson correlation coefficient ( $r^2$ ) for data from primary cancer (PCAWG and TCGA) and cell lines (CCLE). The size of the dot indicates the sample size. Color marks the type of cancer. Tumor type abbreviations from the CCLE cell lines were retrieved from [OncoTree](#). ACC: Acute Myeloid Leukemia, BLCA: Bladder Urothelial Carcinoma, BRCA: Breast invasive carcinoma, CESC: Cervical squamous cell carcinoma and endocervical adenocarcinoma, CHOL: Cholangiocarcinoma, COADREAD: Colon and Rectum adenocarcinoma, DLBC: Lymphoid Neoplasm Diffuse Large B-cell Lymphoma, ESCA: Esophageal carcinoma, GBM: Glioblastoma multiforme, HNSC: Head and Neck squamous cell carcinoma, KICH: Kidney Chromophobe, KIRC: Kidney renal clear cell carcinoma, KIRP: Kidney renal papillary cell carcinoma, LAML: Acute Myeloid Leukemia, LGG: Brain Lower Grade Glioma, LIHC: Liver hepatocellular carcinoma, LUAD: Lung adenocarcinoma, LUSC: Lung squamous cell carcinoma, MESO: Mesothelioma, OV: Ovarian serous cystadenocarcinoma, PAAD: Pancreatic adenocarcinoma, PCPG: Pheochromocytoma and Paraganglioma, PRAD: Prostate adenocarcinoma, SARC: Sarcoma, SKCM: Skin Cutaneous Melanoma, STAD: Stomach adenocarcinoma, TGCT: Testicular Germ Cell Tumors, THCA: Thyroid carcinoma, THYM: Thymoma, UCEC: Uterine Corpus Endometrial Carcinoma, UCS: Uterine Carcinosarcoma, UVM: Uveal Melanoma. BLCA: Bladder Urothelial Carcinoma, BOCA: Bone Cancer, BTCA: Biliary tract cancer, CLLE: Chronic Lymphocytic Leukemia, CMDI: Chronic Myeloid Disorders, DLBC: Lymphoid Neoplasm Diffuse Large B-cell Lymphoma, EOPC: Early Onset Prostate Cancer, ESAD: Esophageal Adenocarcinoma, GACA: Gastric Cancer, KICH: Kidney Chromophobe, LICA: Liver Cancer, LINC: Liver Cancer, LIRI: Liver Cancer, MALY: Malignant Lymphoma, MELA: Melanoma, ORCA: Oral Cancer OV: Ovarian serous cystadenocarcinoma, PACA: Pancreatic Cancer, PAEN: Pancreatic Cancer Endocrine neoplasms, PBCA: Pediatric Brain Cancer, RECA: Renal Cancer, UCEC: Uterine Corpus Endometrial Carcinoma.





**Figure S7. FGA and TMB are poorly correlated in most cancer types.** Pan-cancer overview of the correlation between FGA and TMB reported with Pearson's correlation coefficient ( $r^2$ ) for data from primary cancer (PCAWG and TCGA) and cell lines (CCLE). The size of the dot indicates the sample size. Color marks the type of cancer. Tumor type abbreviations from the CCLE cell lines were retrieved from [OncoTree](#). ACC: Acute Myeloid Leukemia, BLCA: Bladder Urothelial Carcinoma, BRCA: Breast invasive carcinoma, CESC: Cervical squamous cell carcinoma and endocervical adenocarcinoma, CHOL: Cholangiocarcinoma, COADREAD: Colon and Rectum adenocarcinoma, DLBC: Lymphoid Neoplasm Diffuse Large B-cell Lymphoma, ESCA: Esophageal carcinoma, GBM: Glioblastoma multiforme, HNSC: Head and Neck squamous cell carcinoma, KICH: Kidney Chromophobe, KIRC: Kidney renal clear cell carcinoma, KIRP: Kidney renal papillary cell carcinoma, LAML: Acute Myeloid Leukemia, LGG: Brain Lower Grade Glioma, LIHC: Liver hepatocellular carcinoma, LUAD: Lung adenocarcinoma, LUSC: Lung squamous cell carcinoma, MESO: Mesothelioma, OV: Ovarian serous cystadenocarcinoma, PAAD: Pancreatic adenocarcinoma, PCPG: Pheochromocytoma and Paraganglioma, PRAD: Prostate adenocarcinoma, SARC: Sarcoma, SKCM: Skin Cutaneous Melanoma, STAD: Stomach adenocarcinoma, TGCT: Testicular Germ Cell Tumors, THCA: Thyroid carcinoma, THYM: Thymoma, UCEC: Uterine Corpus Endometrial Carcinoma, UCS: Uterine Carcinosarcoma, UVM: Uveal Melanoma. BLCA: Bladder Urothelial Carcinoma, BOCA: Bone Cancer, BTCA: Biliary tract cancer, CLLE: Chronic Lymphocytic Leukemia, CMDI: Chronic Myeloid Disorders, DLBC: Lymphoid Neoplasm Diffuse Large B-cell Lymphoma, EOPC: Early Onset Prostate Cancer, ESAD: Esophageal Adenocarcinoma, GACA: Gastric Cancer, KICH: Kidney Chromophobe, LICA: Liver Cancer, LINC: Liver Cancer, LIRI: Liver Cancer, MALY: Malignant Lymphoma, MELA: Melanoma, ORCA: Oral Cancer OV: Ovarian serous cystadenocarcinoma, PACA: Pancreatic Cancer, PAEN: Pancreatic Cancer Endocrine neoplasms, PBCA: Pediatric Brain Cancer, RECA: Renal Cancer, UCEC: Uterine Corpus Endometrial Carcinoma.

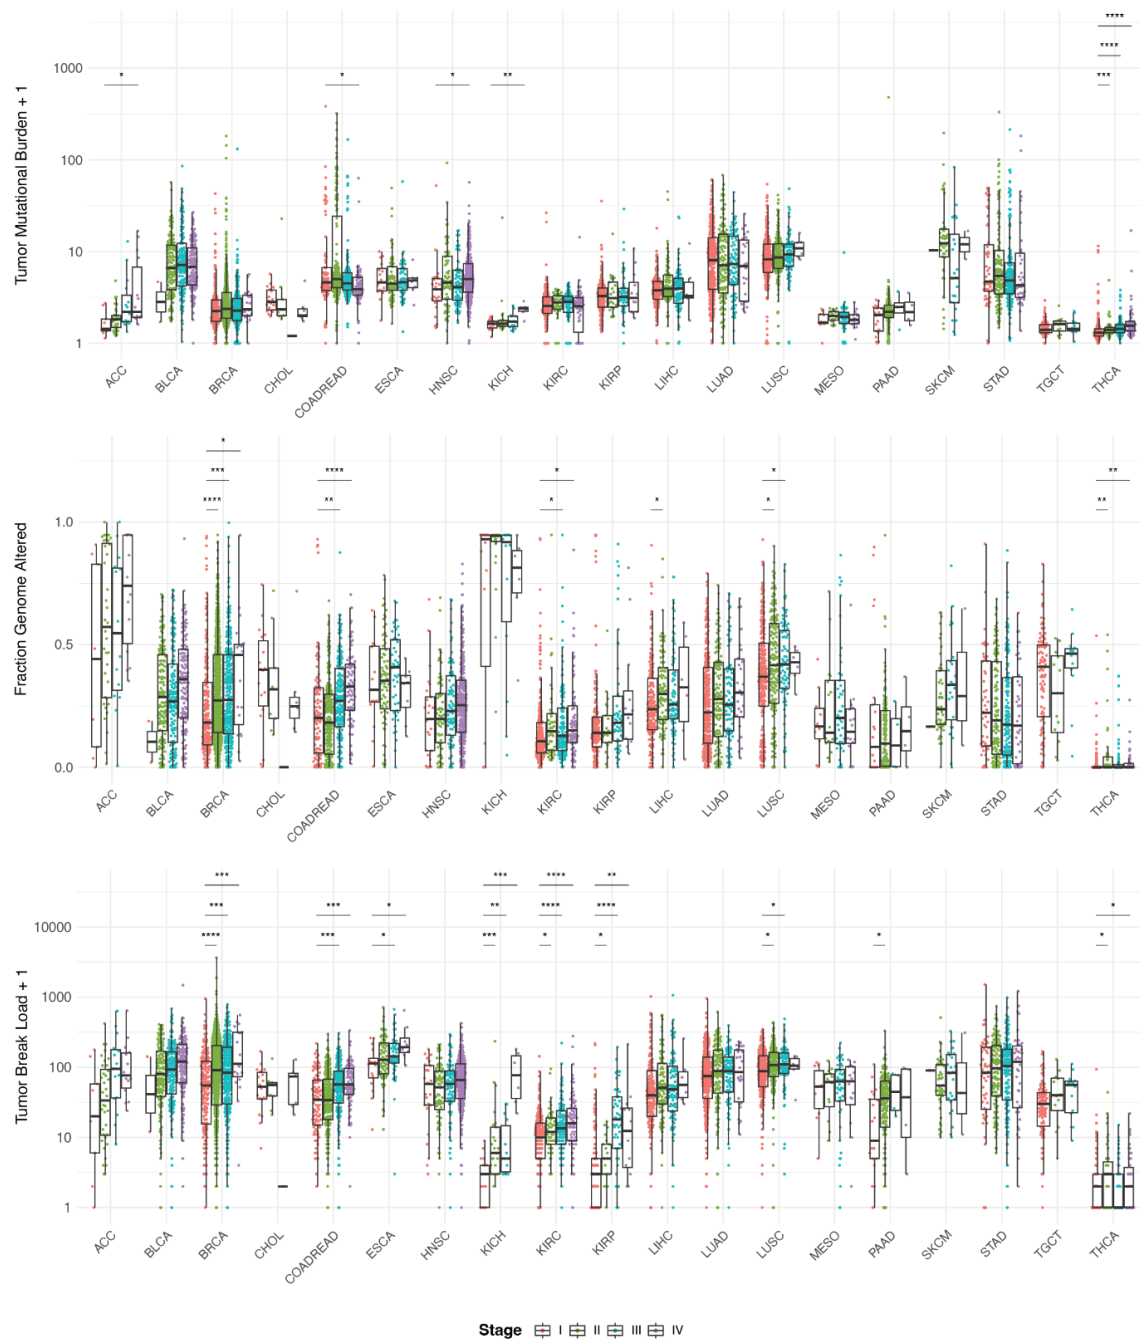

**Figure S8 Stage is associated with an increase in genomic instability measures.** Pan-cancer overview of the distribution of TMB (top), FGA (middle), and TBL (bottom) in TCGA across the different tumor stages (I-IV). TBL shows an increase in later stages in most cancer types. A Mann-Whitney U test was used to assess significance. Multiple hypothesis testing was performed using the Benjamini-Hochberg method. Significance levels: \*\*\*\* =  $p_{adj} < 0.0001$ , \*\*\* =  $p_{adj} < 0.001$ , \*\* =  $p_{adj} < 0.01$ , \* =  $p_{adj} < 0.05$ . Comparisons without significance labels are not significant. ACC: Acute Myeloid Leukemia, BLCA: Bladder Urothelial Carcinoma, BRCA: Breast invasive carcinoma, CESC: Cervical squamous cell carcinoma and endocervical adenocarcinoma, CHOL: Cholangiocarcinoma, COADREAD: Colon and Rectum adenocarcinoma, DLBC: Lymphoid Neoplasm Diffuse Large B-cell Lymphoma, ESCA: Esophageal carcinoma, GBM: Glioblastoma multiforme, HNSC: Head and Neck squamous cell carcinoma, KICH: Kidney Chromophobe, KIRC: Kidney renal clear cell carcinoma, KIRP: Kidney renal papillary cell carcinoma, LIHC: Liver hepatocellular carcinoma, LUAD: Lung adenocarcinoma, LUSC: Lung squamous cell carcinoma, MESO: Mesothelioma, OV: Ovarian serous cystadenocarcinoma, PAAD: Pancreatic adenocarcinoma, PCPG: Pheochromocytoma and Paraganglioma, PRAD: Prostate adenocarcinoma, SARC: Sarcoma, SKCM: Skin Cutaneous Melanoma, STAD: Stomach adenocarcinoma, TGCT: Testicular Germ Cell Tumors, THCA: Thyroid carcinoma, THYM: Thymoma, UCEC: Uterine Corpus Endometrial Carcinoma, UCS: Uterine Carcinosarcoma, UVM: Uveal Melanoma. BLCA: Bladder Urothelial Carcinoma, BOCA: Bone Cancer, BTCA: Biliary tract cancer, CLLE: Chronic Lymphocytic Leukemia, CMDI: Chronic Myeloid Disorders, DLBC: Lymphoid Neoplasm Diffuse Large B-cell Lymphoma, EOPC: Early Onset Prostate Cancer, ESAD: Esophageal Adenocarcinoma, GACA: Gastric Cancer, KICH: Kidney Chromophobe, LICA: Liver Cancer, LINC: Liver Cancer, LIRI: Liver Cancer, MALY: Malignant Lymphoma, MELA: Melanoma, ORCA: Oral Cancer, OV: Ovarian serous cystadenocarcinoma, PACA: Pancreatic Cancer, PAEN: Pancreatic Cancer Endocrine neoplasms, PBCA: Pediatric Brain Cancer, RECA: Renal Cancer, UCEC: Uterine Corpus Endometrial Carcinoma.

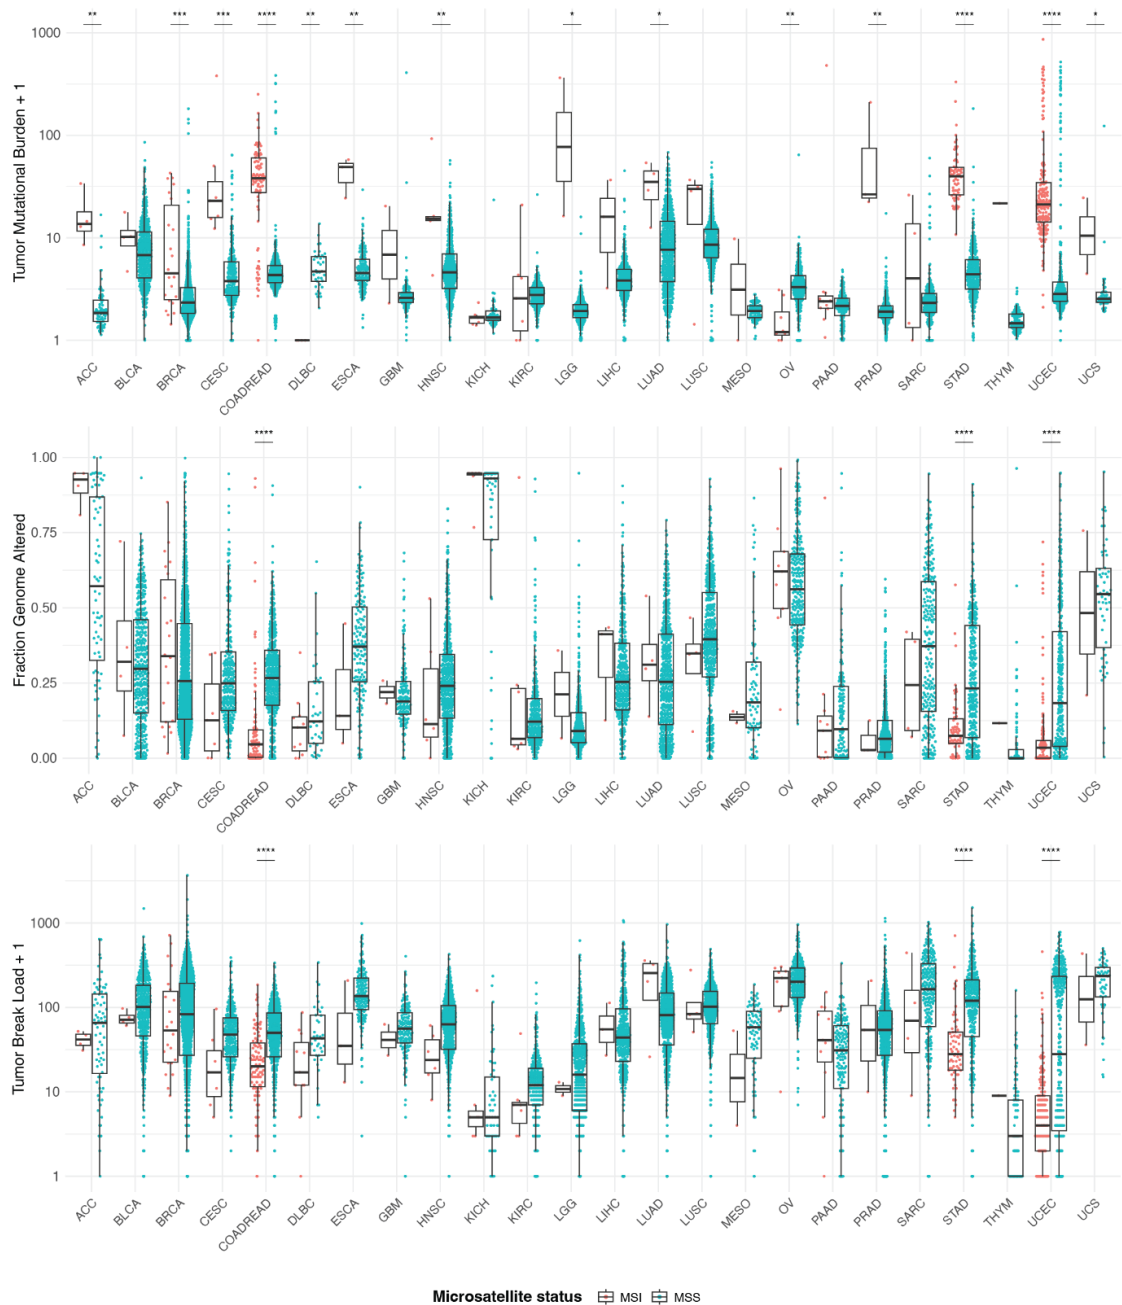

**Figure S9. The MSI phenotype is associated with differences in genomic instability measures.** Pan-cancer overview of the distribution of TMB (top), FGA (middle), and TBL (bottom) for MSI (red) and MSS (blue) tumor samples using data from the TCGA. MSI samples display a higher TMB in most cancer types. Some cancer types show a significantly higher TBL for MSS samples. A Mann-Whitney U test was used to assess significance. Multiple hypothesis testing was performed using the Benjamini-Hochberg method. Significance levels: \*\*\*\* =  $p_{adj} < 0.0001$ , \*\*\* =  $p_{adj} < 0.001$ , \*\* =  $p_{adj} < 0.01$ , \* =  $p_{adj} < 0.05$ . Comparisons without significance labels are not significant. ACC: Acute Myeloid Leukemia, BLCA: Bladder Urothelial Carcinoma, BRCA: Breast invasive carcinoma, CESC: Cervical squamous cell carcinoma and endocervical adenocarcinoma, CHOL: Cholangiocarcinoma, COADREAD: Colon and Rectum adenocarcinoma, DLBC: Lymphoid Neoplasm Diffuse Large B-cell Lymphoma, ESCA: Esophageal carcinoma, GBM: Glioblastoma multiforme, HNSC: Head and Neck squamous cell carcinoma, KICH: Kidney Chromophobe, KIRC: Kidney renal clear cell carcinoma, KIRP: Kidney renal papillary cell carcinoma, LAML: Acute Myeloid Leukemia, LGG: Brain Lower Grade Glioma, LIHC: Liver hepatocellular carcinoma, LUAD: Lung adenocarcinoma, LUSC: Lung squamous cell carcinoma, MESO: Mesothelioma, OV: Ovarian serous cystadenocarcinoma, PAAD: Pancreatic adenocarcinoma, PCPG: Pheochromocytoma and Paraganglioma, PRAD: Prostate adenocarcinoma, SARC: Sarcoma, SKCM: Skin Cutaneous Melanoma, STAD: Stomach adenocarcinoma, TGCT: Testicular Germ Cell Tumors, THCA: Thyroid carcinoma, THYM: Thymoma, UCEC: Uterine Corpus Endometrial Carcinoma, UCS: Uterine Carcinosarcoma, UVM: Uveal Melanoma. BLCA: Bladder Urothelial Carcinoma, BOCA: Bone Cancer, BTCA: Biliary tract cancer, CLL: Chronic Lymphocytic Leukemia, CMDI: Chronic Myeloid Disorders, DLBC: Lymphoid Neoplasm Diffuse Large B-cell Lymphoma, EOPC: Early Onset Prostate Cancer, ESAD: Esophageal Adenocarcinoma, GACA: Gastric Cancer, KICH: Kidney Chromophobe, LICA: Liver Cancer, LINC: Liver Cancer, LIRI: Liver Cancer, MALY: Malignant Lymphoma, MELA: Melanoma, ORCA: Oral Cancer, OV: Ovarian serous cystadenocarcinoma, PACA: Pancreatic Cancer, PAEN: Pancreatic Cancer Endocrine neoplasms, PBCA: Pediatric Brain Cancer, RECA: Renal Cancer, UCEC: Uterine Corpus Endometrial Carcinoma.

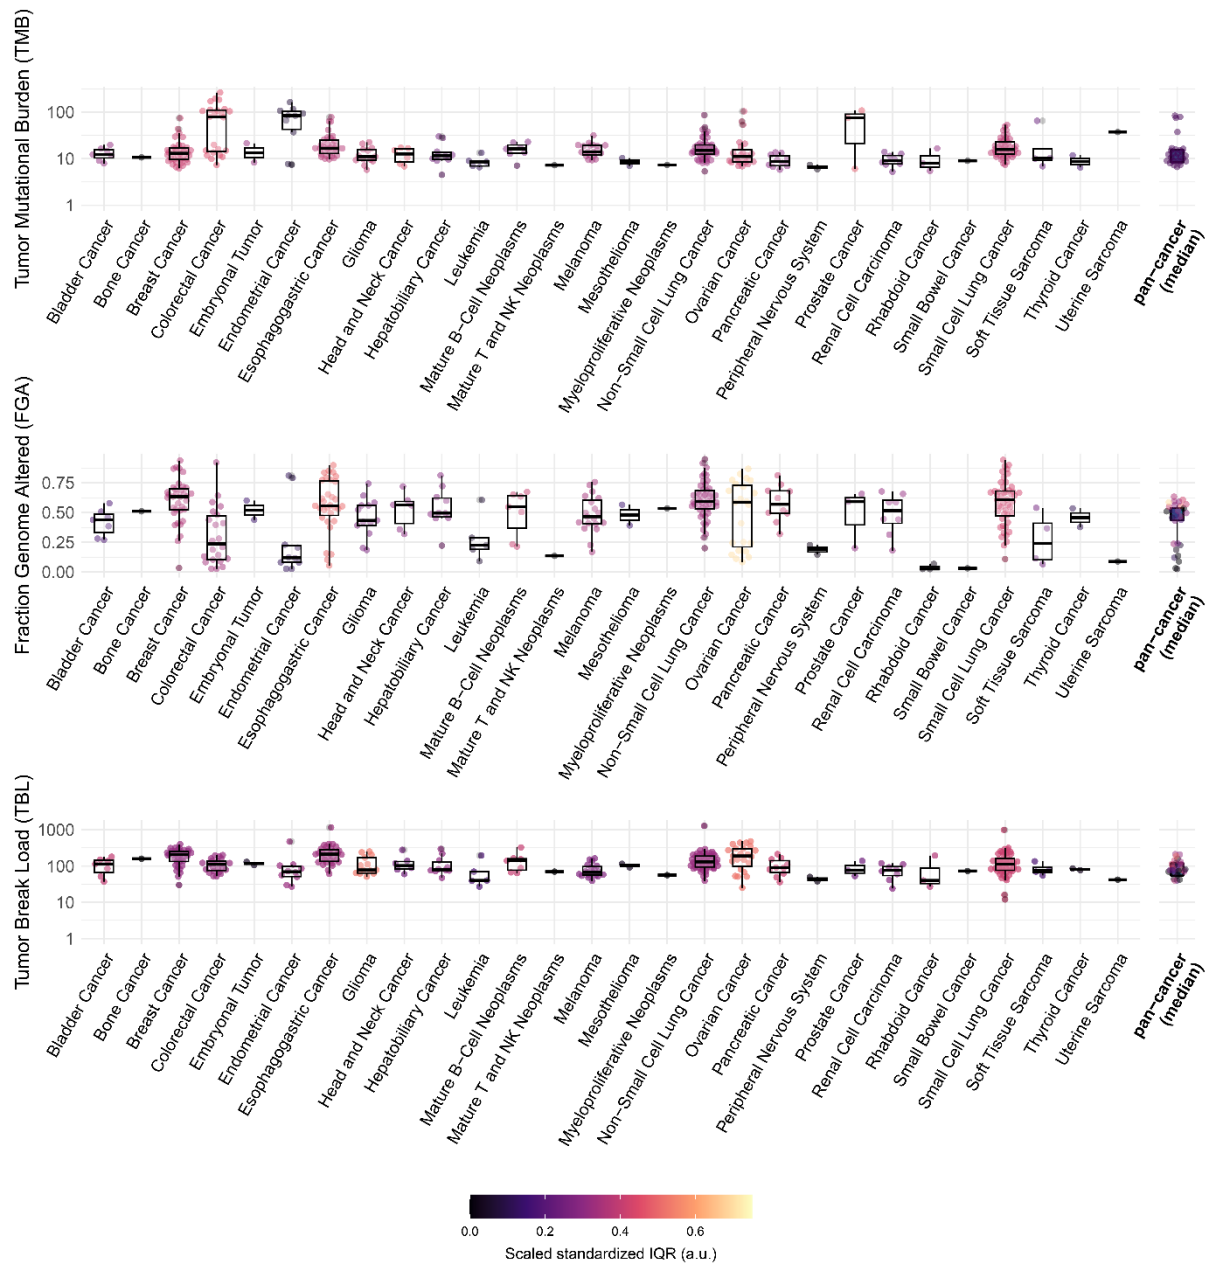

**Figure S10. High levels of genomic instability in cancer cell lines.** Pan-cancer overview of the tumor mutational burden (TMB), the fraction genome altered (FGA), and the tumor break load (TBL) in cancer cell lines. TMB and TBL are visualized on a log<sub>10</sub> scale. The color indicates the scaled standardized interquartile range (IQR) calculated from the ranked measures. The medians of all cancer types are reported as pan-cancer (median).

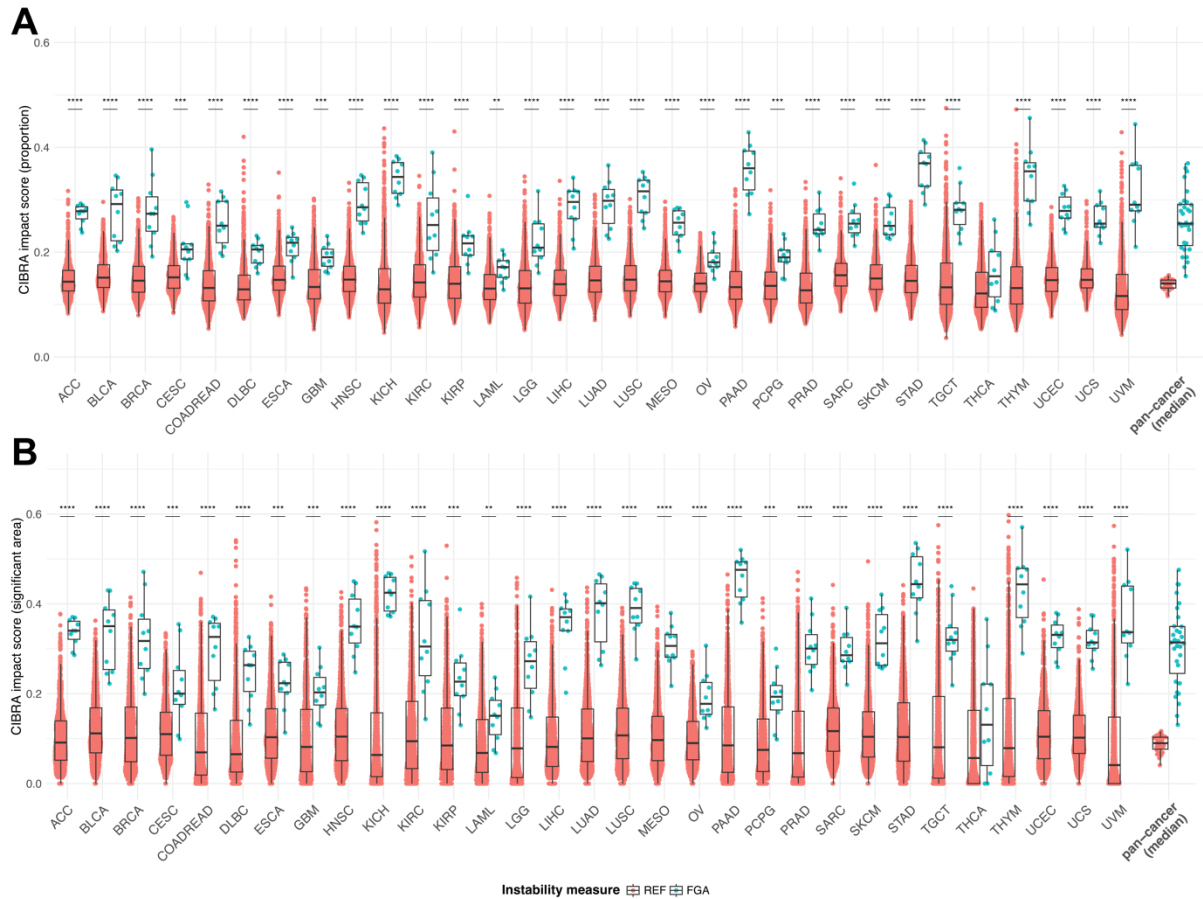

**Figure S11 CIBRA analysis of FGA high versus low as a control case shows high impact scores in most cancer types.** CIBRA impact score (significant area) for comparison of tumor samples from both extremes of the FGA distribution. Because FGA is associated with large-scale gene expression changes, we considered CIBRA analysis unsuitable for FGA, and the resulting scores should only be considered as a control case. We dichotomized the samples into a high and low group (top and bottom 25%), creating 10 subsample datasets of 10 HIGH and 10 LOW samples each. The resulting CIBRA scores were compared to a reference distribution of scores from 1000 random permutations of the dataset. We report two impact scores: CIBRA proportion (**A**) and significant area (**B**). Statistical significance was assessed using a Mann-Whitney U test. We used multiple hypothesis correction using the Benjamini-Hochberg method. Significance levels: \*\*\*\* =  $p_{adj} < 0.0001$ , \*\*\* =  $p_{adj} < 0.001$ , \*\* =  $p_{adj} < 0.01$ , \* =  $p_{adj} < 0.05$ . Comparisons without significance labels are not significant. ACC: Acute Myeloid Leukemia, BLCA: Bladder Urothelial Carcinoma, BRCA: Breast invasive carcinoma, CESC: Cervical squamous cell carcinoma and endocervical adenocarcinoma, CHOL: Cholangiocarcinoma, COADREAD: Colon and Rectum adenocarcinoma, DLBC: Lymphoid Neoplasm Diffuse Large B-cell Lymphoma, ESCA: Esophageal carcinoma, GBM: Glioblastoma multiforme, HNSC: Head and Neck squamous cell carcinoma, KICH: Kidney Chromophobe, KIRC: Kidney renal clear cell carcinoma, KIRP: Kidney renal papillary cell carcinoma, LAML: Acute Myeloid Leukemia, LGG: Brain Lower Grade Glioma, LIHC: Liver hepatocellular carcinoma, LUAD: Lung adenocarcinoma, LUSC: Lung squamous cell carcinoma, MESO: Mesothelioma, OV: Ovarian serous cystadenocarcinoma, PAAD: Pancreatic adenocarcinoma, PCPG: Pheochromocytoma and Paraganglioma, PRAD: Prostate adenocarcinoma, SARC: Sarcoma, SKCM: Skin Cutaneous Melanoma, STAD: Stomach adenocarcinoma, TGCT: Testicular Germ Cell Tumors, THCA: Thyroid carcinoma, THYM: Thymoma, UCEC: Uterine Corpus Endometrial Carcinoma, UCS: Uterine Carcinosarcoma, UVM: Uveal Melanoma. BLCA: Bladder Urothelial Carcinoma, BOCA: Bone Cancer, BTCA: Biliary tract cancer, CLLE: Chronic Lymphocytic Leukemia, CMDI: Chronic Myeloid Disorders, DLBC: Lymphoid Neoplasm Diffuse Large B-cell Lymphoma, EOPC: Early Onset Prostate Cancer, ESAD: Esophageal Adenocarcinoma, GACA: Gastric Cancer, KICH: Kidney Chromophobe, LICA: Liver Cancer, LINC: Liver Cancer, LIRI: Liver Cancer, MALY: Malignant Lymphoma, MELA: Melanoma, ORCA: Oral Cancer, OV: Ovarian serous cystadenocarcinoma, PACA: Pancreatic Cancer, PAEN: Pancreatic Cancer Endocrine neoplasms, PBCA: Pediatric Brain Cancer, RECA: Renal Cancer, UCEC: Uterine Corpus Endometrial Carcinoma.

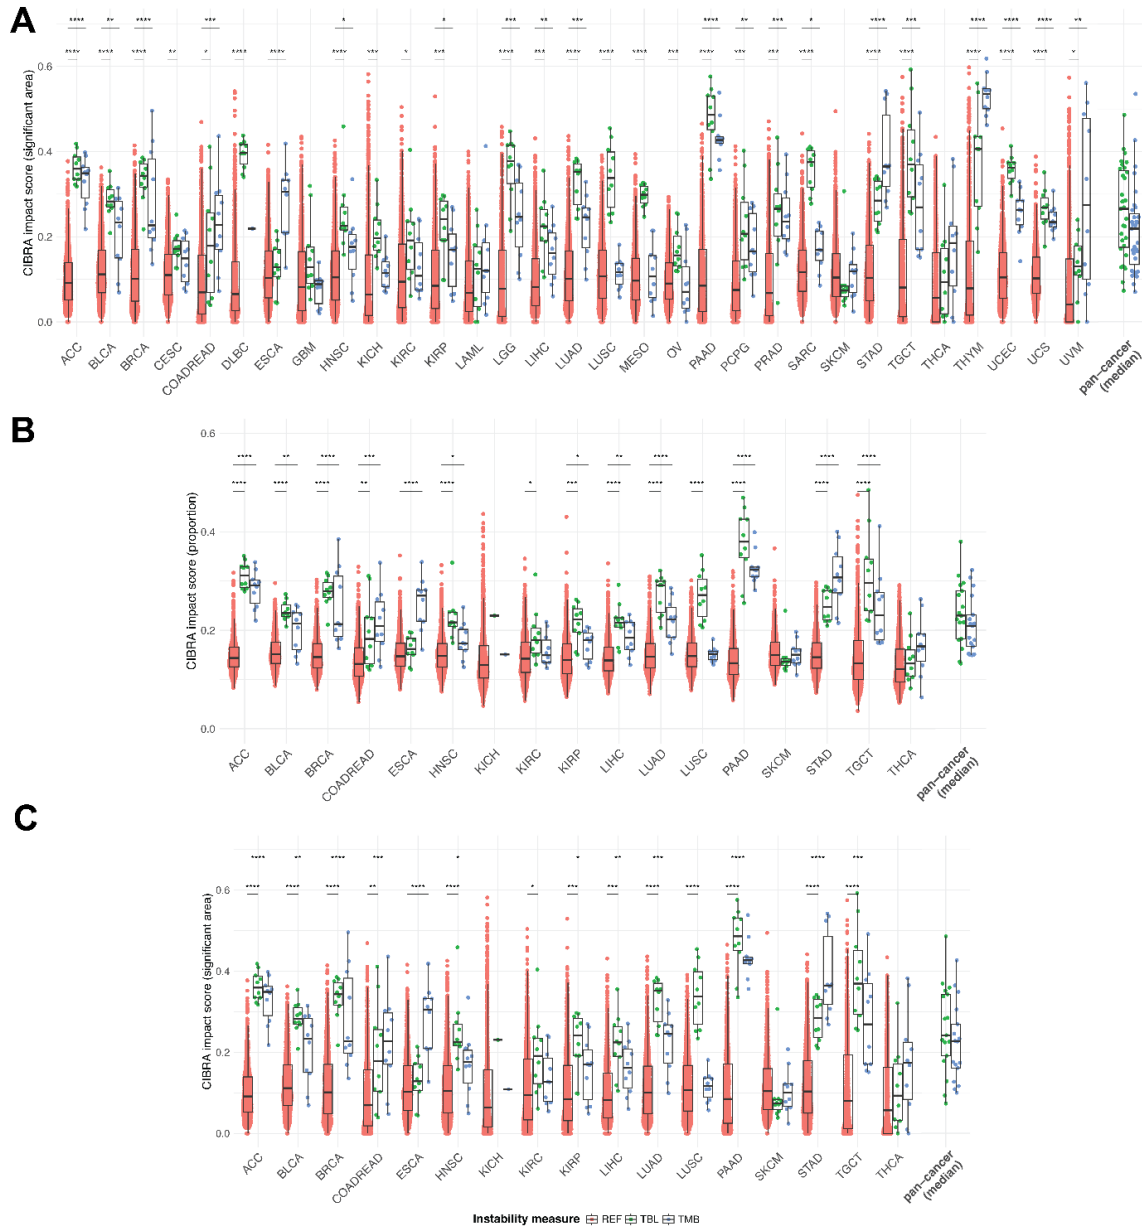

**Figure S12 TBL is associated with altered gene expression in most cancer types using data from TCGA.** CIBRA impact score (significant area) for comparison of tumor samples from both extremes of the genomic instability distribution. For each genomic instability measure and cancer type, we dichotomized the samples into a high and low group (top and bottom 25%), creating 10 subsample datasets of 10 HIGH and 10 LOW samples each. The resulting CIBRA scores were compared to a reference distribution of scores from 1000 random permutations of the dataset. We performed the analysis for all primary cancer samples (**A**), as well as exclusively MSS samples in stage I-II (**B**, **C**). Cancer types for which no stage or MSS/MSI information was available were filtered out for the second analysis. We report two impact scores: CIBRA proportion (**B**) and significant area (**A**, **C**). Statistical significance was assessed using a Mann-Whitney U test. We used multiple hypothesis correction using the Benjamini-Hochberg method. Significance levels: \*\*\*\* =  $p_{adj} < 0.0001$ , \*\*\* =  $p_{adj} < 0.001$ , \*\* =  $p_{adj} < 0.01$ , \* =  $p_{adj} < 0.05$ . Comparisons without significance labels are not significant. ACC: Acute Myeloid Leukemia, BLCA: Bladder Urothelial Carcinoma, BRCA: Breast invasive carcinoma, CESC: Cervical squamous cell carcinoma and endocervical adenocarcinoma, CHOL: Cholangiocarcinoma, COADREAD: Colon and Rectum adenocarcinoma, DLBC: Lymphoid Neoplasm Diffuse Large B-cell Lymphoma, ESCA: Esophageal carcinoma, GBM: Glioblastoma multiforme, HNSC: Head and Neck squamous cell carcinoma, KICH: Kidney Chromophobe, KIRC: Kidney renal clear cell carcinoma, KIRP: Kidney renal papillary cell carcinoma, LAML: Acute Myeloid Leukemia, LGG: Brain Lower Grade Glioma, LIHC: Liver hepatocellular carcinoma, LUAD: Lung adenocarcinoma, LUSC: Lung squamous cell carcinoma, MESO: Mesothelioma, OV: Ovarian serous cystadenocarcinoma, PAAD: Pancreatic adenocarcinoma, PCPG: Pheochromocytoma and Paraganglioma, PRAD: Prostate adenocarcinoma, SARC: Sarcoma, SKCM: Skin Cutaneous Melanoma, STAD: Stomach adenocarcinoma, TGCT: Testicular Germ Cell Tumors, THCA: Thyroid carcinoma, THYM: Thymoma, UCEC: Uterine Corpus Endometrial Carcinoma, UCS: Uterine Carcinosarcoma, UVM: Uveal Melanoma. BLCA: Bladder Urothelial Carcinoma, BOCA: Bone Cancer, BTCA: Biliary tract cancer, CLLE: Chronic Lymphocytic Leukemia, CMDI: Chronic Myeloid Disorders, DLBC: Lymphoid Neoplasm Diffuse Large B-cell Lymphoma, EOPC: Early Onset Prostate Cancer, ESAD: Esophageal Adenocarcinoma, GACA: Gastric Cancer, KICH: Kidney Chromophobe, LICA: Liver Cancer, LINC: Liver Cancer, LIRI: Liver Cancer, MALY: Malignant Lymphoma, MELA: Melanoma, ORCA: Oral Cancer, OV: Ovarian serous cystadenocarcinoma, PACA: Pancreatic Cancer, PAEN: Pancreatic Cancer Endocrine neoplasms, PBCA: Pediatric Brain Cancer, RECA: Renal Cancer, UCEC: Uterine Corpus Endometrial Carcinoma.



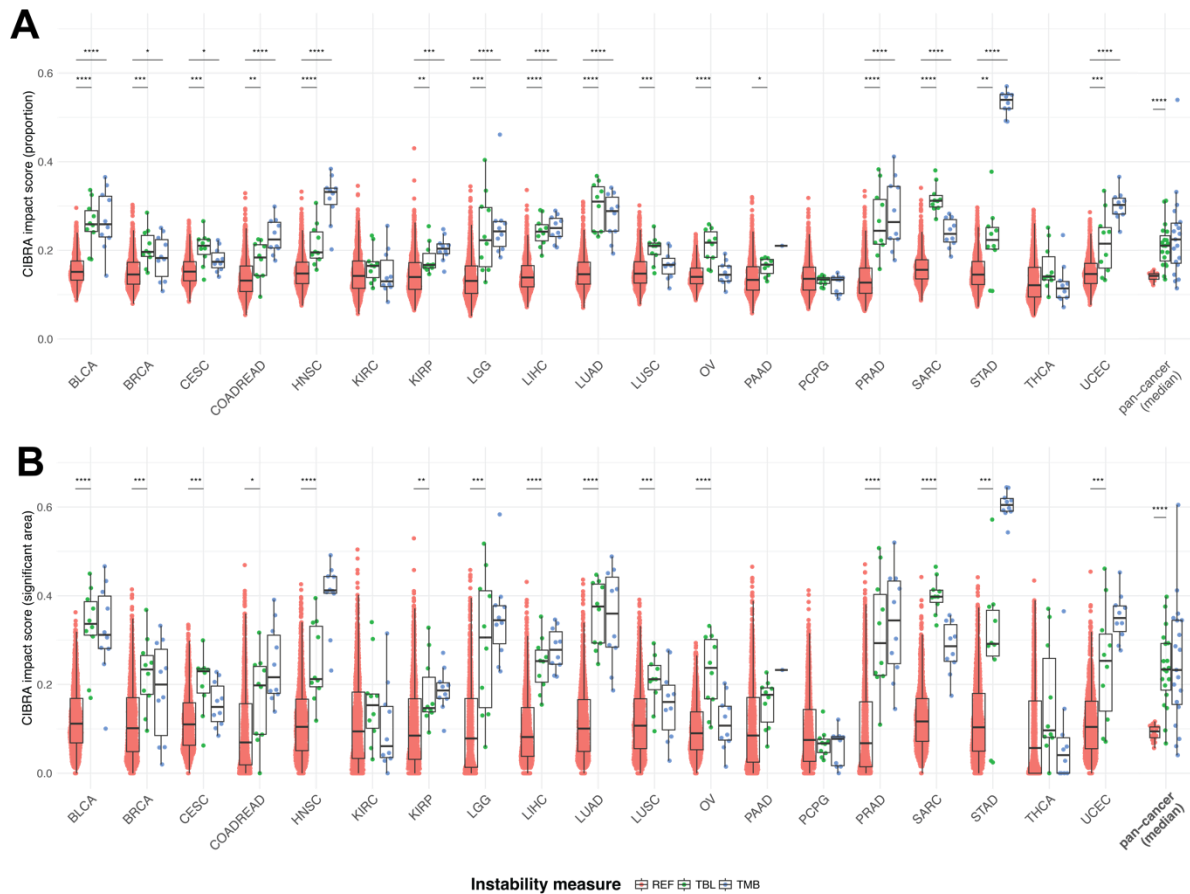

**Figure S13 TBL is associated with altered gene expression in many cancer types in a cohort of samples with low FGA.** CIBRA impact scores (proportion and significant area) for comparison of tumor samples from both extremes of the genomic instability distribution. For each cancer type, we selected the samples falling in the lower quantile of the FGA distribution. Subsequently, for each genomic instability measure, we dichotomized the samples into a high and low group (top and bottom 25%), creating 10 subsample datasets of 10 HIGH and 10 LOW samples each. The resulting CIBRA scores were compared to a reference distribution of scores from 1000 random permutations of the dataset. We report two impact scores: CIBRA proportion (**A**) and significant area (**B**). Statistical significance was assessed using a Mann-Whitney U test. We used multiple hypothesis correction using the Benjamini-Hochberg method. Significance levels: \*\*\*\* =  $p_{adj} < 0.0001$ , \*\*\* =  $p_{adj} < 0.001$ , \*\* =  $p_{adj} < 0.01$ , \* =  $p_{adj} < 0.05$ . Comparisons without significance labels are not significant. BLCA: Bladder Urothelial Carcinoma, BRCA: Breast invasive carcinoma, CESC: Cervical squamous cell carcinoma and endocervical adenocarcinoma, COADREAD: Colon and Rectum adenocarcinoma, HNSC: Head and Neck squamous cell carcinoma, KIRC: Kidney renal clear cell carcinoma, KIRP: Kidney renal papillary cell carcinoma, LGG: Brain Lower Grade Glioma, LIHC: Liver hepatocellular carcinoma, LUAD: Lung adenocarcinoma, LUSC: Lung squamous cell carcinoma, OV: Ovarian serous cystadenocarcinoma, PAAD: Pancreatic adenocarcinoma, PCPG: Pheochromocytoma and Paraganglioma, PRAD: Prostate adenocarcinoma, SARC: Sarcoma, STAD: Stomach adenocarcinoma, THCA: Thyroid carcinoma, UCEC: Uterine Corpus Endometrial Carcinoma.



# PCAWG

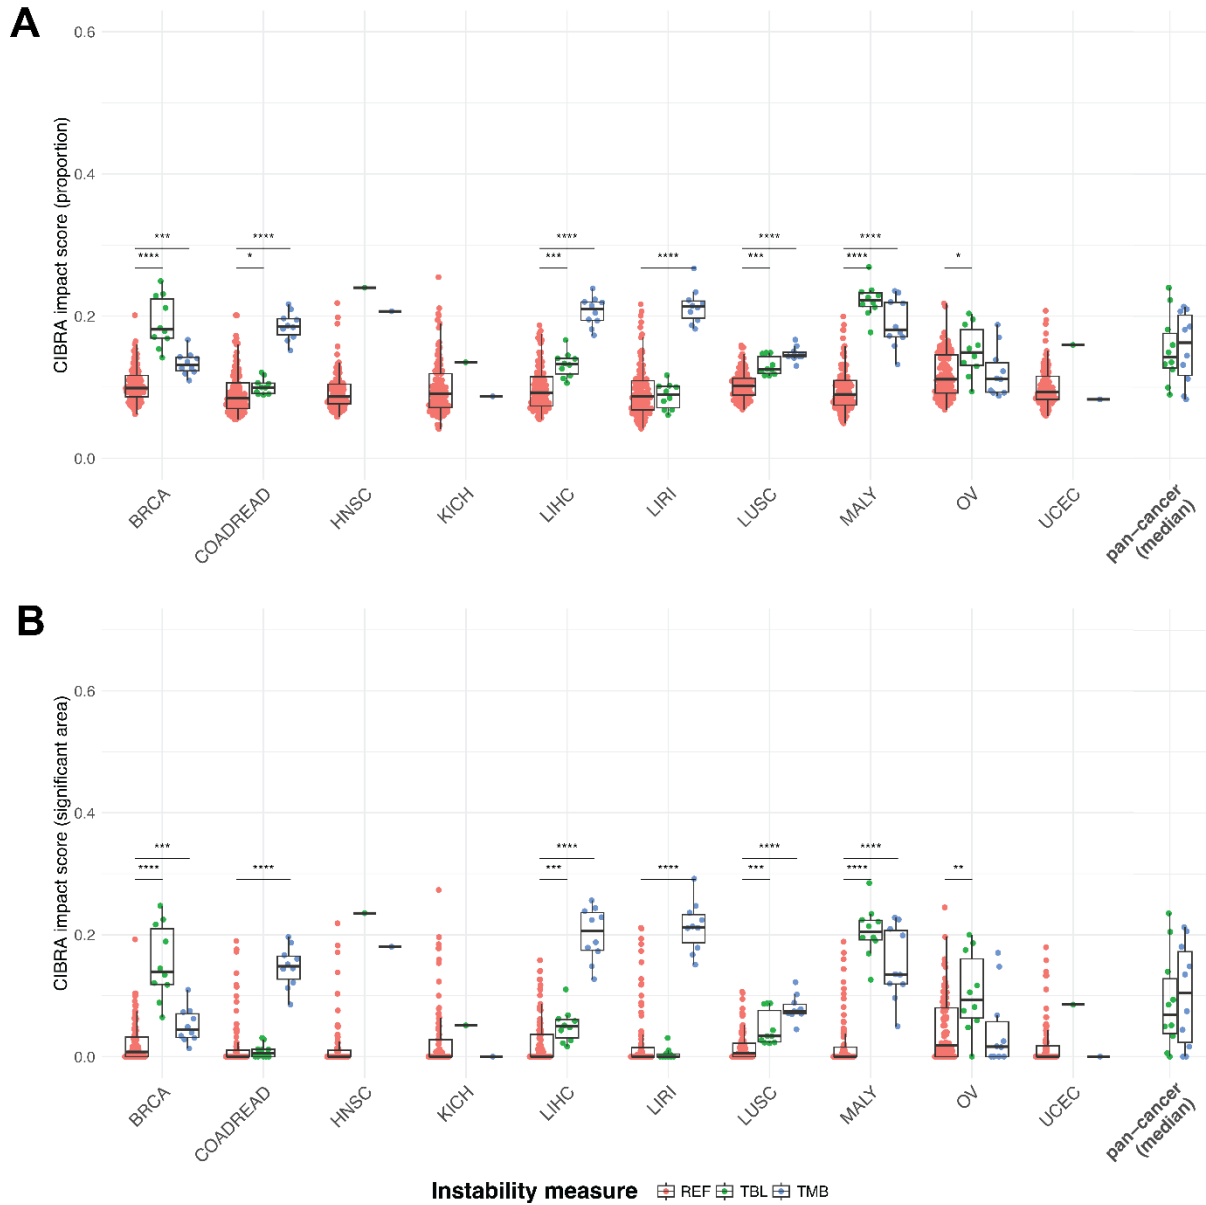

**Figure S14 CIBRA impact scores for the PCAWG dataset.** CIBRA impact score (significant area) for the comparison of tumor samples from both extremes of the genomic instability distribution. For each genomic instability measure and cancer type, we dichotomized the samples into a high and low group (top and bottom 25%), creating 10 subsample datasets of 10 HIGH and 10 LOW samples each. The resulting CIBRA scores were compared to a reference distribution of 100 random permutations of the dataset. We report two impact scores: CIBRA proportion (**A**) and significant area (**B**). Statistical significance was assessed using a Mann-Whitney U test. We used multiple hypothesis correction using the Benjamini-Hochberg method. Significance levels: \*\*\*\* =  $p_{adj} < 0.0001$ , \*\*\* =  $p_{adj} < 0.001$ , \*\* =  $p_{adj} < 0.01$ , \* =  $p_{adj} < 0.05$ . Comparisons without significance labels are not significant. ACC: Acute Myeloid Leukemia, BLCA: Bladder Urothelial Carcinoma, BRCA: Breast invasive carcinoma, CESC: Cervical squamous cell carcinoma and endocervical adenocarcinoma, CHOL: Cholangiocarcinoma, COADREAD: Colon and Rectum adenocarcinoma, DLBC: Lymphoid Neoplasm Diffuse Large B-cell Lymphoma, ESCA: Esophageal carcinoma, GBM: Glioblastoma multiforme, HNSC: Head and Neck squamous cell carcinoma, KICH: Kidney Chromophobe, KIRC: Kidney renal clear cell carcinoma, KIRP: Kidney renal papillary cell carcinoma, LAML: Acute Myeloid Leukemia, LGG: Brain Lower Grade Glioma, LIHC: Liver hepatocellular carcinoma, LUAD: Lung adenocarcinoma, LUSC: Lung squamous cell carcinoma, MESO: Mesothelioma, OV: Ovarian serous cystadenocarcinoma, PAAD: Pancreatic adenocarcinoma, PCPG: Pheochromocytoma and Paraganglioma, PRAD: Prostate adenocarcinoma, SARC: Sarcoma, SKCM: Skin Cutaneous Melanoma, STAD: Stomach adenocarcinoma, TGCT: Testicular Germ Cell Tumors, THCA: Thyroid carcinoma, THYM: Thymoma, UCEC: Uterine Corpus Endometrial Carcinoma, UCS: Uterine Carcinosarcoma, UVM: Uveal Melanoma. BLCA: Bladder Urothelial Carcinoma, BOCA: Bone Cancer, BTCA: Biliary tract cancer, CLLE: Chronic Lymphocytic Leukemia, CMDI: Chronic Myeloid Disorders, DLBC: Lymphoid Neoplasm Diffuse Large B-cell Lymphoma, EOPC: Early Onset Prostate Cancer, ESAD: Esophageal Adenocarcinoma, GACA: Gastric Cancer, KICH: Kidney Chromophobe, LICA: Liver Cancer, LIRC: Liver Cancer, MALY: Malignant Lymphoma, MELA: Melanoma, ORCA: Oral Cancer, OV: Ovarian serous cystadenocarcinoma, PACA: Pancreatic Cancer, PAEN: Pancreatic Cancer Endocrine neoplasms, PBCA: Pediatric Brain Cancer, RECA: Renal Cancer, UCEC: Uterine Corpus Endometrial Carcinoma.

## GSEA TMB

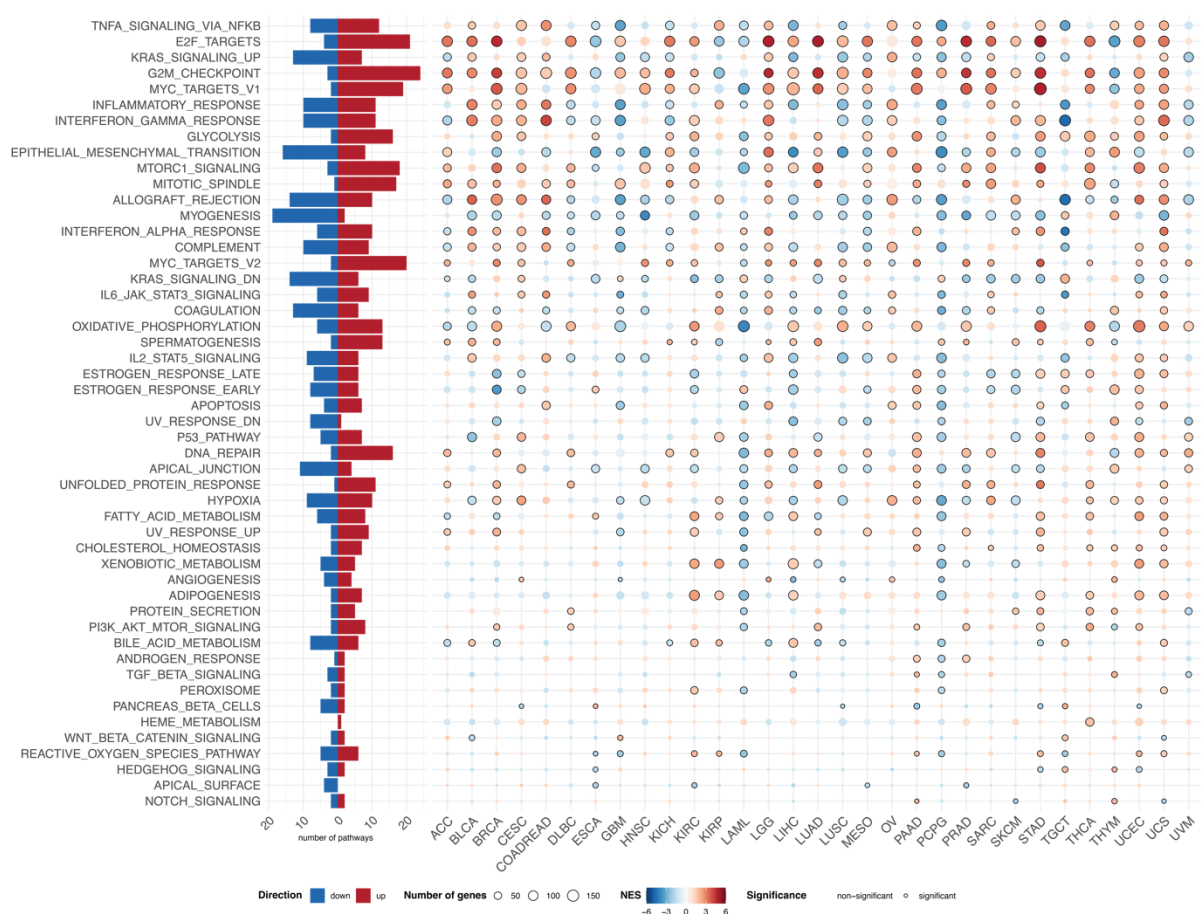

**Figure S15. Results of GSEA for TMB-high vs TMB-low using the MSigDb Hallmark Gene Set.** Pathways are ranked according to the number of cancer types in which they are differentially expressed in the TBL-high vs TBL-low comparison. Left: Summary plot indicating the number of cancer-types in which a pathway is significantly up-or down-regulated (red for up-regulated pathways, blue for down-regulated pathways). Right: Heatmap of the GSEA results per tumor type. Colors indicate Normalized Enrichment Scores (NSE; red for up-regulated pathways, blue for down-regulated pathways). Multiple testing correction was performed using the Benjamini-Hochberg method. Black circles indicate significance (adjusted p-value < 0.01). ACC: Acute Myeloid Leukemia, BLCA: Bladder Urothelial Carcinoma, BRCA: Breast invasive carcinoma, CESC: Cervical squamous cell carcinoma and endocervical adenocarcinoma, CHOL: Cholangiocarcinoma, COADREAD: Colon and Rectum adenocarcinoma, DLBC: Lymphoid Neoplasm Diffuse Large B-cell Lymphoma, ESCA: Esophageal carcinoma, GBM: Glioblastoma multiforme, HNSC: Head and Neck squamous cell carcinoma, KICH: Kidney Chromophobe, KIRC: Kidney renal clear cell carcinoma, KIRP: Kidney renal papillary cell carcinoma, LAML: Acute Myeloid Leukemia, LGG: Brain Lower Grade Glioma, LIHC: Liver hepatocellular carcinoma, LUAD: Lung adenocarcinoma, LUSC: Lung squamous cell carcinoma, MESO: Mesothelioma, OV: Ovarian serous cystadenocarcinoma, PAAD: Pancreatic adenocarcinoma, PCCPG: Pheochromocytoma and Paraganglioma, PRAD: Prostate adenocarcinoma, SARC: Sarcoma, SKCM: Skin Cutaneous Melanoma, STAD: Stomach adenocarcinoma, TGCT: Testicular Germ Cell Tumors, THCA: Thyroid carcinoma, THYM: Thymoma, UCEC: Uterine Corpus Endometrial Carcinoma, UCS: Uterine Carcinosarcoma, UVM: Uveal Melanoma. BLCA: Bladder Urothelial Carcinoma, BOCA: Bone Cancer, BTCA: Biliary tract cancer, CLLE: Chronic Lymphocytic Leukemia, CMDI: Chronic Myeloid Disorders, DLBC: Lymphoid Neoplasm Diffuse Large B-cell Lymphoma, EOPC: Early Onset Prostate Cancer, ESAD: Esophageal Adenocarcinoma, GACA: Gastric Cancer, KICH: Kidney Chromophobe, LICA: Liver Cancer, LINC: Liver Cancer, LIRI: Liver Cancer, MALY: Malignant Lymphoma, MELA: Melanoma, ORCA: Oral Cancer, OV: Ovarian serous cystadenocarcinoma, PACA: Pancreatic Cancer, PAEN: Pancreatic Cancer Endocrine neoplasms, PBCA: Pediatric Brain Cancer, RECA: Renal Cancer, UCEC: Uterine Corpus Endometrial Carcinoma.

## GSEA early-stage MSS TBL

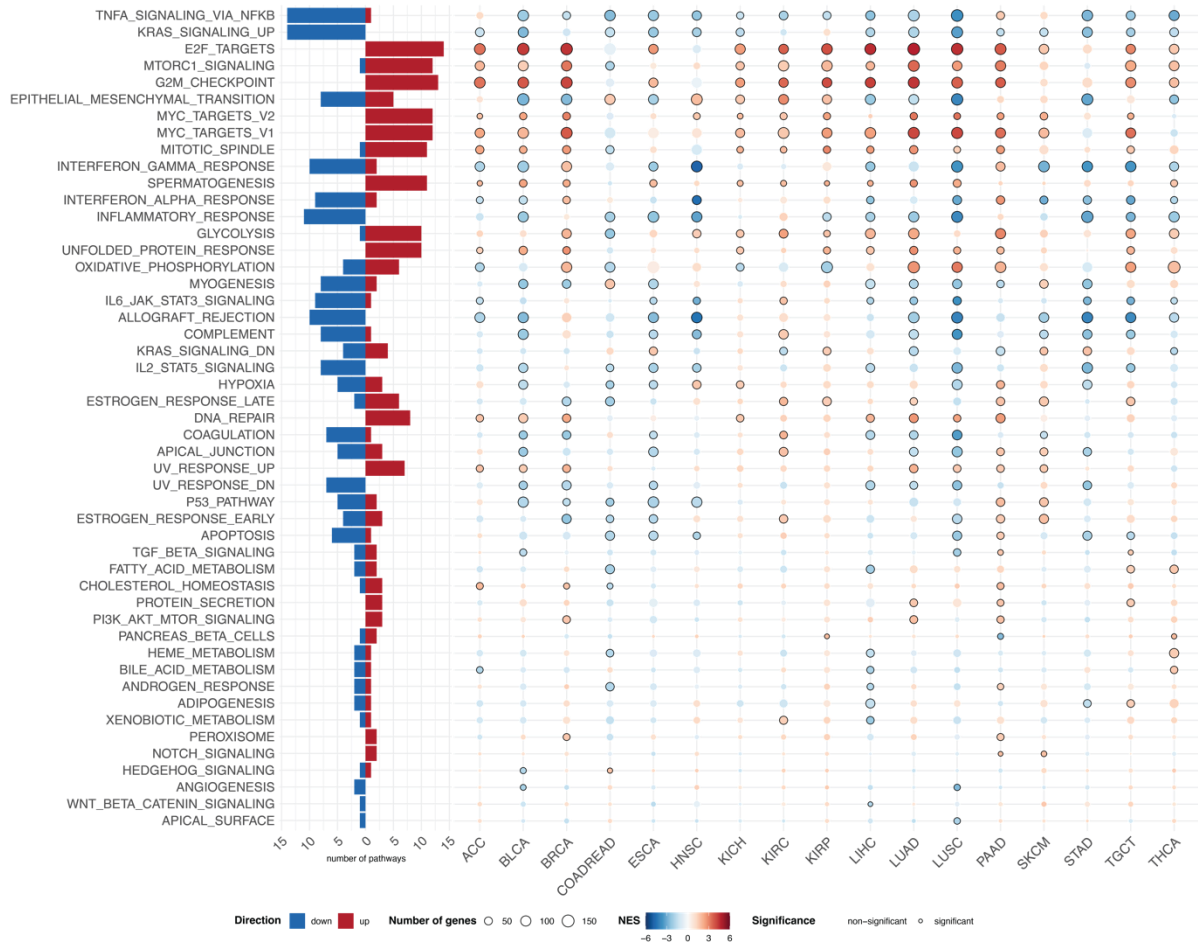

**Figure S16. Results of GSEA analysis for TBL-high vs TBL-low in early-stage MSS (TCGA) using the MSigDb Hallmark Gene Set.** Pathways are ordered based on the number of cancer types in which they are differentially expressed. *Left: Summary plot indicating the number of cancer-types in which a pathway is significantly up-or down-regulated (red for up-regulated pathways, blue for down-regulated pathways).* *Right: Heatmap of the GSEA results per tumor type.* Colors indicate Normalized Enrichment Scores (NES; red for up-regulated pathways, blue for down-regulated pathways). Multiple testing correction was performed using the Benjamini-Hochberg method. Black circles indicate significance (adjusted p-value < 0.01). ACC: Acute Myeloid Leukemia, BLCA: Bladder Urothelial Carcinoma, BRCA: Breast invasive carcinoma, CESC: Cervical squamous cell carcinoma and endocervical adenocarcinoma, CHOL: Cholangiocarcinoma, COADREAD: Colon and Rectum adenocarcinoma, DLBC: Lymphoid Neoplasm Diffuse Large B-cell Lymphoma, ESCA: Esophageal carcinoma, GBM: Glioblastoma multiforme, HNSC: Head and Neck squamous cell carcinoma, KICH: Kidney Chromophobe, KIRC: Kidney renal clear cell carcinoma, KIRP: Kidney renal papillary cell carcinoma, LAML: Acute Myeloid Leukemia, LGG: Brain Lower Grade Glioma, LIHC: Liver hepatocellular carcinoma, LUAD: Lung adenocarcinoma, LUSC: Lung squamous cell carcinoma, MESO: Mesothelioma, OV: Ovarian serous cystadenocarcinoma, PAAD: Pancreatic adenocarcinoma, PCPG: Pheochromocytoma and Paraganglioma, PRAD: Prostate adenocarcinoma, SARC: Sarcoma, SKCM: Skin Cutaneous Melanoma, STAD: Stomach adenocarcinoma, TGCT: Testicular Germ Cell Tumors, THCA: Thyroid carcinoma, THYM: Thymoma, UCEC: Uterine Corpus Endometrial Carcinoma, UCS: Uterine Carcinosarcoma, UVM: Uveal Melanoma. BLCA: Bladder Urothelial Carcinoma, BOCA: Bone Cancer, BTCA: Biliary tract cancer, CLLE: Chronic Lymphocytic Leukemia, CMDI: Chronic Myeloid Disorders, DLBC: Lymphoid Neoplasm Diffuse Large B-cell Lymphoma, EOPC: Early Onset Prostate Cancer, ESAD: Esophageal Adenocarcinoma, GACA: Gastric Cancer, KICH: Kidney Chromophobe, LICA: Liver Cancer, LINC: Liver Cancer, LIRI: Liver Cancer, MALY: Malignant Lymphoma, MELA: Melanoma, ORCA: Oral Cancer, OV: Ovarian serous cystadenocarcinoma, PACA: Pancreatic Cancer, PAEN: Pancreatic Cancer Endocrine neoplasms, PBCA: Pediatric Brain Cancer, RECA: Renal Cancer, UCEC: Uterine Corpus Endometrial Carcinoma.

## GSEA early-stage MSS TMB

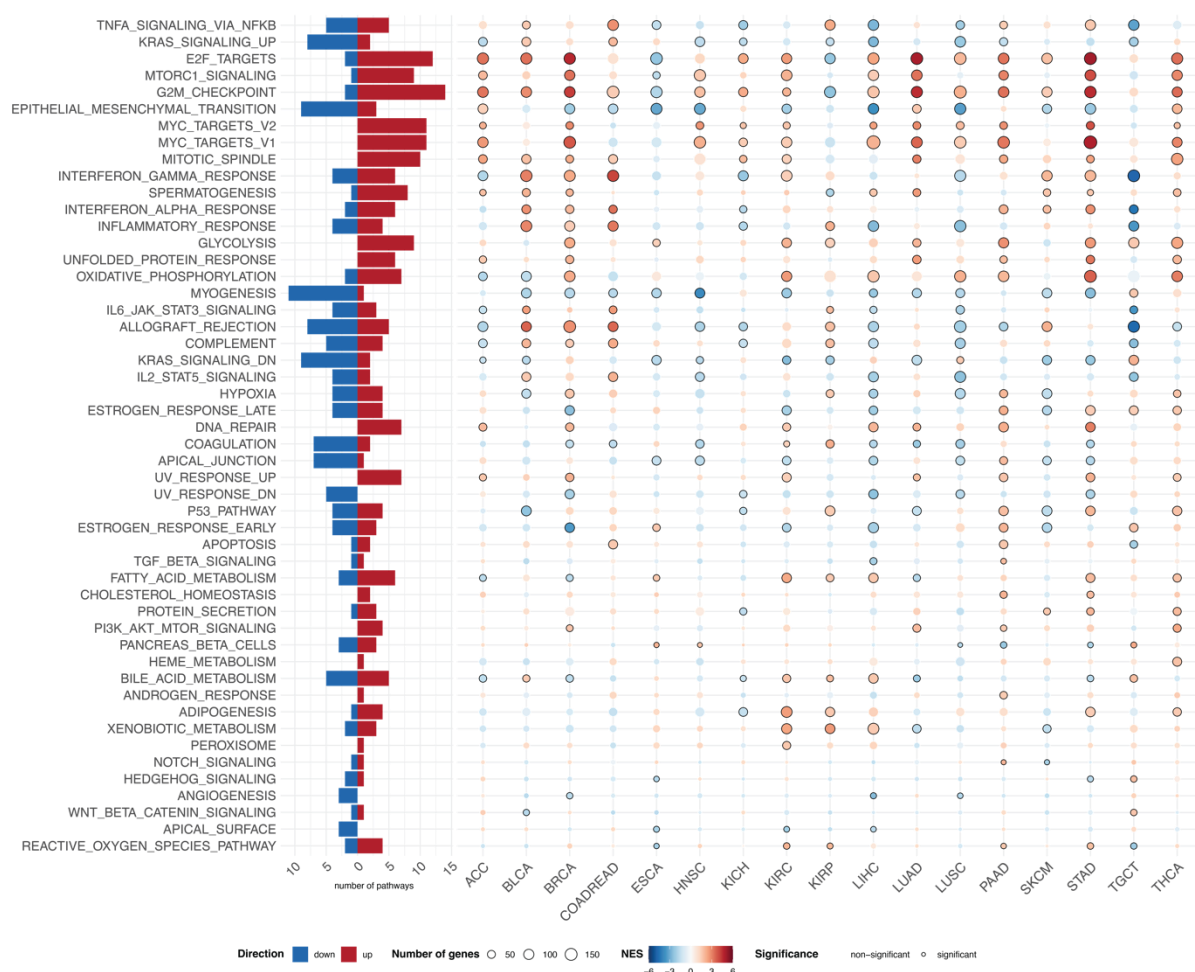

**Figure S17. Results of GSEA analysis for TMB-high vs TMB-low in early-stage MSS (TCGA) using the MSigDb Hallmark Gene Set.** Pathways are ordered based on the number of cancer types in which they are differentially expressed in the early-MSS TBL-high vs TBL-low comparison. *Left: Summary plot indicating the number of cancer-types in which a pathway is significantly up-or down-regulated (red for up-regulated pathways, blue for down-regulated pathways).* *Right: Heatmap of the GSEA results per tumor type.* Colors indicate Normalized Enrichment Scores (NES; red for up-regulated pathways, blue for down-regulated pathways). Multiple testing correction was performed using the Benjamini-Hochberg method. Black circles indicate significance (adjusted p-value < 0.01). ACC: Acute Myeloid Leukemia, BLCA: Bladder Urothelial Carcinoma, BRCA: Breast invasive carcinoma, CESC: Cervical squamous cell carcinoma and endocervical adenocarcinoma, CHOL: Cholangiocarcinoma, COADREAD: Colon and Rectum adenocarcinoma, DLBC: Lymphoid Neoplasm Diffuse Large B-cell Lymphoma, ESCA: Esophageal carcinoma, GBM: Glioblastoma multiforme, HNSC: Head and Neck squamous cell carcinoma, KICH: Kidney Chromophobe, KIRC: Kidney renal clear cell carcinoma, KIRP: Kidney renal papillary cell carcinoma, LAML: Acute Myeloid Leukemia, LGG: Brain Lower Grade Glioma, LIHC: Liver hepatocellular carcinoma, LUAD: Lung adenocarcinoma, LUSC: Lung squamous cell carcinoma, MESO: Mesothelioma, OV: Ovarian serous cystadenocarcinoma, PAAD: Pancreatic adenocarcinoma, PCPG: Pheochromocytoma and Paraganglioma, PRAD: Prostate adenocarcinoma, SARC: Sarcoma, SKCM: Skin Cutaneous Melanoma, STAD: Stomach adenocarcinoma, TGCT: Testicular Germ Cell Tumors, THCA: Thyroid carcinoma, THYM: Thymoma, UCEC: Uterine Corpus Endometrial Carcinoma, UCS: Uterine Carcinosarcoma, UVM: Uveal Melanoma. BLCA: Bladder Urothelial Carcinoma, BOCA: Bone Cancer, BTCA: Biliary tract cancer, CLLE: Chronic Lymphocytic Leukemia, CMDI: Chronic Myeloid Disorders, DLBC: Lymphoid Neoplasm Diffuse Large B-cell Lymphoma, EOPC: Early Onset Prostate Cancer, ESAD: Esophageal Adenocarcinoma, GACA: Gastric Cancer, KICH: Kidney Chromophobe, LICA: Liver Cancer, LINC: Liver Cancer, LIRI: Liver Cancer, MALY: Malignant Lymphoma, MELA: Melanoma, ORCA: Oral Cancer, OV: Ovarian serous cystadenocarcinoma, PACA: Pancreatic Cancer, PAEN: Pancreatic Cancer Endocrine neoplasms, PBCA: Pediatric Brain Cancer, RECA: Renal Cancer, UCEC: Uterine Corpus Endometrial Carcinoma.

## PCAWG: GSEA TBL

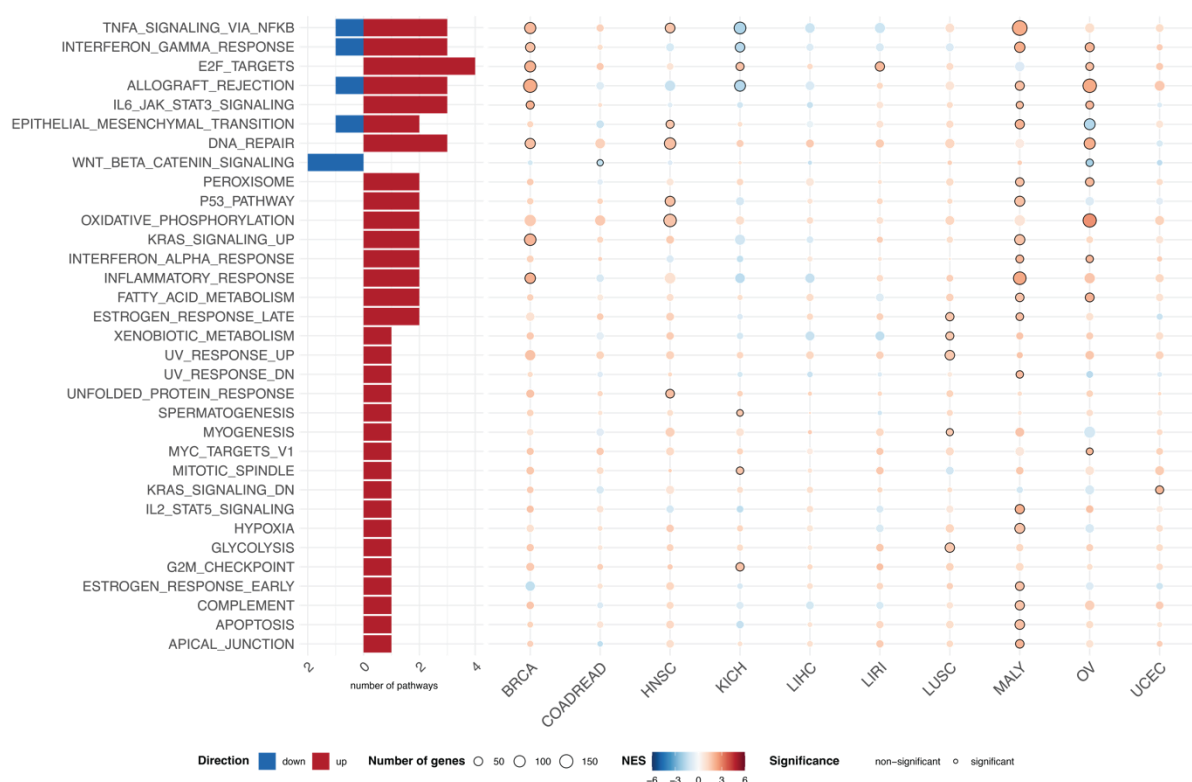

**Figure S18. Results of GSEA analysis for TBL-high vs TBL-low (PCAWG) using the MSigDb Hallmark Gene Set.** Pathways are ordered based on the number of cancer types in which they are differentially expressed. *Left: Summary plot indicating the number of cancer-types in which a pathway is significantly up-or down-regulated (red for up-regulated pathways, blue for down-regulated pathways). Right: Heatmap of the GSEA results per tumor type.* Colors indicate Normalized Enrichment Scores (NES; red for up-regulated pathways, blue for down-regulated pathways). Multiple testing correction was performed using the Benjamini-Hochberg method. Black circles indicate significance (adjusted p-value < 0.01). ACC: Acute Myeloid Leukemia, BLCA: Bladder Urothelial Carcinoma, BRCA: Breast invasive carcinoma, CESC: Cervical squamous cell carcinoma and endocervical adenocarcinoma, CHOL: Cholangiocarcinoma, COADREAD: Colon and Rectum adenocarcinoma, DLBC: Lymphoid Neoplasm Diffuse Large B-cell Lymphoma, ESCA: Esophageal carcinoma, GBM: Glioblastoma multiforme, HNSC: Head and Neck squamous cell carcinoma, KICH: Kidney Chromophobe, KIRC: Kidney renal clear cell carcinoma, KIRP: Kidney renal papillary cell carcinoma, LAML: Acute Myeloid Leukemia, LGG: Brain Lower Grade Glioma, LIHC: Liver hepatocellular carcinoma, LUAD: Lung adenocarcinoma, LUSC: Lung squamous cell carcinoma, MESO: Mesothelioma, OV: Ovarian serous cystadenocarcinoma, PAAD: Pancreatic adenocarcinoma, PCPG: Pheochromocytoma and Paraganglioma, PRAD: Prostate adenocarcinoma, SARC: Sarcoma, SKCM: Skin Cutaneous Melanoma, STAD: Stomach adenocarcinoma, TGCT: Testicular Germ Cell Tumors, THCA: Thyroid carcinoma, THYM: Thymoma, UCEC: Uterine Corpus Endometrial Carcinoma, UCS: Uterine Carcinosarcoma, UVM: Uveal Melanoma. BLCA: Bladder Urothelial Carcinoma, BOCA: Bone Cancer, BTCA: Biliary tract cancer, CLLE: Chronic Lymphocytic Leukemia, CMDI: Chronic Myeloid Disorders, DLBC: Lymphoid Neoplasm Diffuse Large B-cell Lymphoma, EOPC: Early Onset Prostate Cancer, ESAD: Esophageal Adenocarcinoma, GACA: Gastric Cancer, KICH: Kidney Chromophobe, LICA: Liver Cancer, LINC: Liver Cancer, LIRI: Liver Cancer, MALY: Malignant Lymphoma, MELA: Melanoma, ORCA: Oral Cancer, OV: Ovarian serous cystadenocarcinoma, PACA: Pancreatic Cancer, PAEN: Pancreatic Cancer Endocrine neoplasms, PBCA: Pediatric Brain Cancer, RECA: Renal Cancer, UCEC: Uterine Corpus Endometrial Carcinoma.

## PCAWG: GSEA TMB

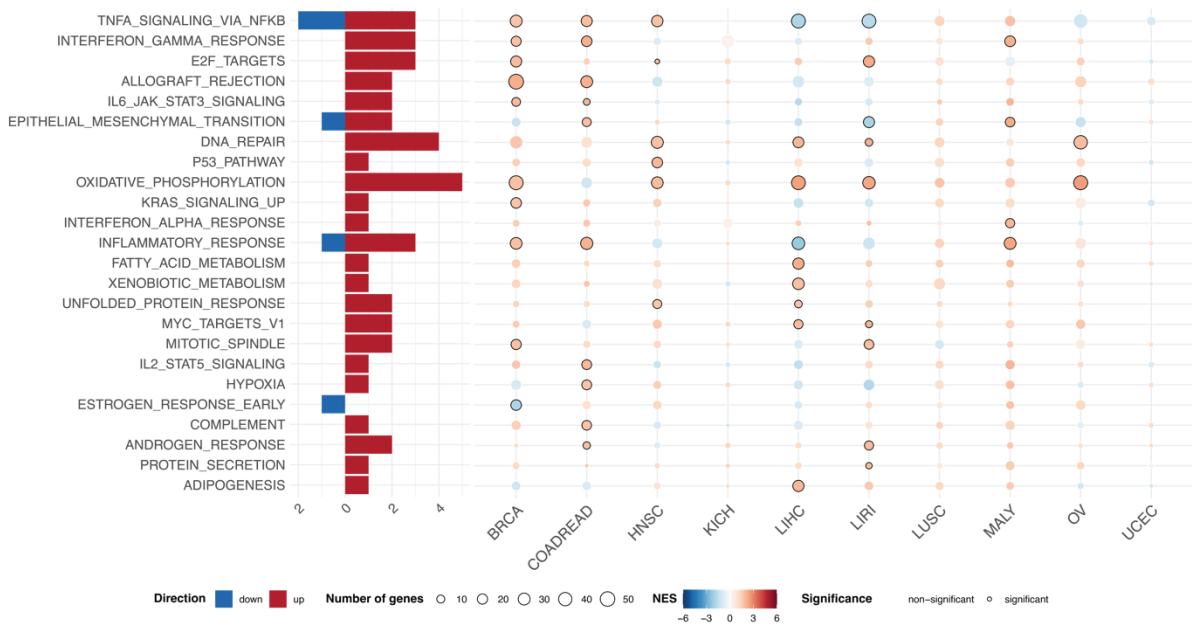

**Figure S19. Results of GSEA analysis for TMB-high vs TMB-low (PCAWG) using the MSigDb Hallmark Gene Set** Pathways are ordered based on the number of cancer types in which they are differentially expressed in the PCAWG TBL-high vs TBL-low comparison. *Left: Summary plot indicating the number of cancer-types in which a pathway is significantly up-or down-regulated (red for up-regulated pathways, blue for down-regulated pathways). Right: Heatmap of the GSEA results per tumor type.* Colors indicate Normalized Enrichment Scores (NES; red for up-regulated pathways, blue for down-regulated pathways). Multiple testing correction was performed using the Benjamini-Hochberg method. Black circles indicate significance (adjusted p-value < 0.01). ACC: Acute Myeloid Leukemia, BLCA: Bladder Urothelial Carcinoma, BRCA: Breast invasive carcinoma, CESC: Cervical squamous cell carcinoma and endocervical adenocarcinoma, CHOL: Cholangiocarcinoma, COADREAD: Colon and Rectum adenocarcinoma, DLBC: Lymphoid Neoplasm Diffuse Large B-cell Lymphoma, ESCA: Esophageal carcinoma, GBM: Glioblastoma multiforme, HNSC: Head and Neck squamous cell carcinoma, KICH: Kidney Chromophobe, KIRC: Kidney renal clear cell carcinoma, KIRP: Kidney renal papillary cell carcinoma, LAML: Acute Myeloid Leukemia, LGG: Brain Lower Grade Glioma, LIHC: Liver hepatocellular carcinoma, LUAD: Lung adenocarcinoma, LUSC: Lung squamous cell carcinoma, MESO: Mesothelioma, OV: Ovarian serous cystadenocarcinoma, PAAD: Pancreatic adenocarcinoma, PCPG: Pheochromocytoma and Paraganglioma, PRAD: Prostate adenocarcinoma, SARC: Sarcoma, SKCM: Skin Cutaneous Melanoma, STAD: Stomach adenocarcinoma, TGCT: Testicular Germ Cell Tumors, THCA: Thyroid carcinoma, THYM: Thymoma, UCEC: Uterine Corpus Endometrial Carcinoma, UCS: Uterine Carcinosarcoma, UVM: Uveal Melanoma. BLCA: Bladder Urothelial Carcinoma, BOCA: Bone Cancer, BTCA: Biliary tract cancer, CLLE: Chronic Lymphocytic Leukemia, CMDI: Chronic Myeloid Disorders, DLBC: Lymphoid Neoplasm Diffuse Large B-cell Lymphoma, EOPC: Early Onset Prostate Cancer, ESAD: Esophageal Adenocarcinoma, GACA: Gastric Cancer, KICH: Kidney Chromophobe, LICA: Liver Cancer, LINC: Liver Cancer, LIRI: Liver Cancer, MALY: Malignant Lymphoma, MELA: Melanoma, ORCA: Oral Cancer OV: Ovarian serous cystadenocarcinoma, PACA: Pancreatic Cancer, PAEN: Pancreatic Cancer Endocrine neoplasms, PBCA: Pediatric Brain Cancer, RECA: Renal Cancer, UCEC: Uterine Corpus Endometrial Carcinoma.



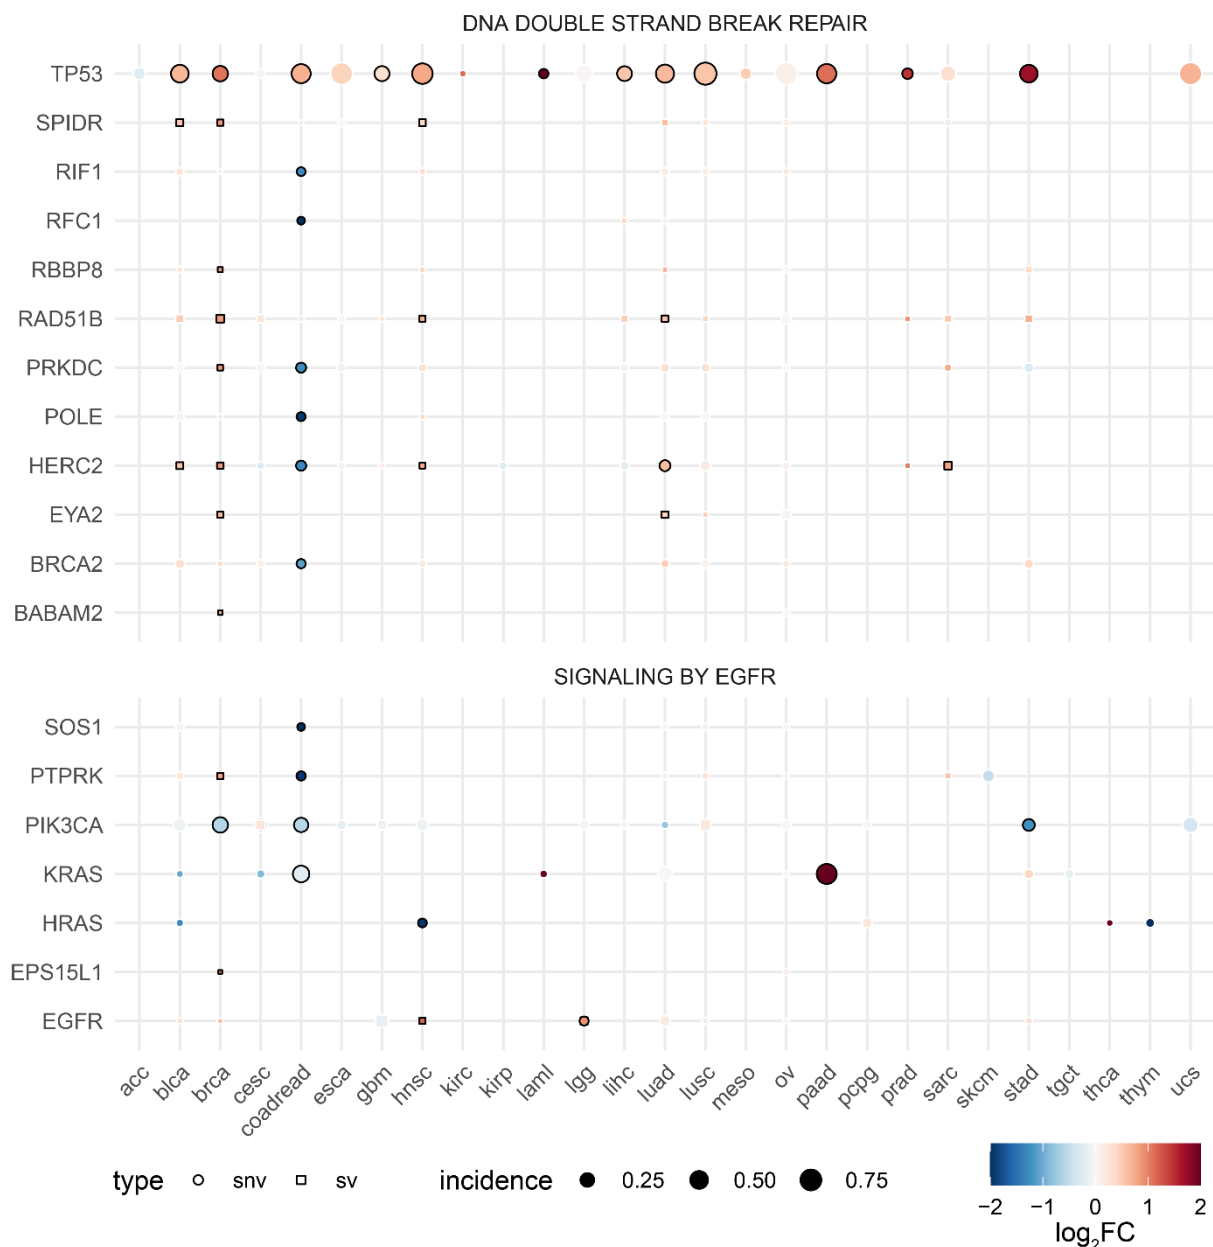

**Figure S20.** Pan-cancer representation of the change in FGA with respect to genomic alterations in genes related to DNA double strand break repair and signaling by EGFR using the Reactome pathway representations. Only genes with a significant association with changes in the FGA in at least one cancer type are shown. Color represents the log<sub>2</sub> fold change of the FGA, dot size represents the fraction of samples with a genomic alteration in the corresponding gene, and the dot shape represents the type of genomic alteration affecting the gene. The border of the dots has been colored black when the analysis was significant with an adjusted p-value < 0.05. ACC: Acute Myeloid Leukemia, BLCA: Bladder Urothelial Carcinoma, BRCA: Breast invasive carcinoma, CESC: Cervical squamous cell carcinoma and endocervical adenocarcinoma, CHOL: Cholangiocarcinoma, COADREAD: Colon and Rectum adenocarcinoma, DLBC: Lymphoid Neoplasm Diffuse Large B-cell Lymphoma, ESCA: Esophageal carcinoma, GBM: Glioblastoma multiforme, HNSC: Head and Neck squamous cell carcinoma, KICH: Kidney Chromophobe, KIRC: Kidney renal clear cell carcinoma, KIRP: Kidney renal papillary cell carcinoma, LAML: Acute Myeloid Leukemia, LGG: Lower Grade Glioma, LIHC: Liver hepatocellular carcinoma, LUAD: Lung adenocarcinoma, LUSC: Lung squamous cell carcinoma, MESO: Mesothelioma, OV: Ovarian serous cystadenocarcinoma, PAAD: Pancreatic adenocarcinoma, PCPG: Pheochromocytoma and Paraganglioma, PRAD: Prostate adenocarcinoma, SARC: Sarcoma, SKCM: Skin Cutaneous Melanoma, STAD: Stomach adenocarcinoma, TGCT: Testicular Germ Cell Tumors, THCA: Thyroid carcinoma, THYM: Thymoma, UCEC: Uterine Corpus Endometrial Carcinoma, UCS: Uterine Carcinosarcoma, UVM: Uveal Melanoma. BLCA: Bladder Urothelial Carcinoma, BOCA: Bone Cancer, BTCA: Biliary tract cancer, CLLE: Chronic Lymphocytic Leukemia, CMDI: Chronic Myeloid Disorders, DLBC: Lymphoid Neoplasm Diffuse Large B-cell Lymphoma, EOPC: Early Onset Prostate Cancer, ESAD: Esophageal Adenocarcinoma, GACA: Gastric Cancer, KICH: Kidney Chromophobe, LICA: Liver Cancer, LINC: Liver Cancer, LIRI: Liver Cancer, MALY: Malignant Lymphoma, MELA: Melanoma, ORCA: Oral Cancer OV: Ovarian serous cystadenocarcinoma, PACA: Pancreatic Cancer, PAEN: Pancreatic Cancer Endocrine neoplasms, PBCA: Pediatric Brain Cancer, RECA: Renal Cancer, UCEC: Uterine Corpus Endometrial Carcinoma.

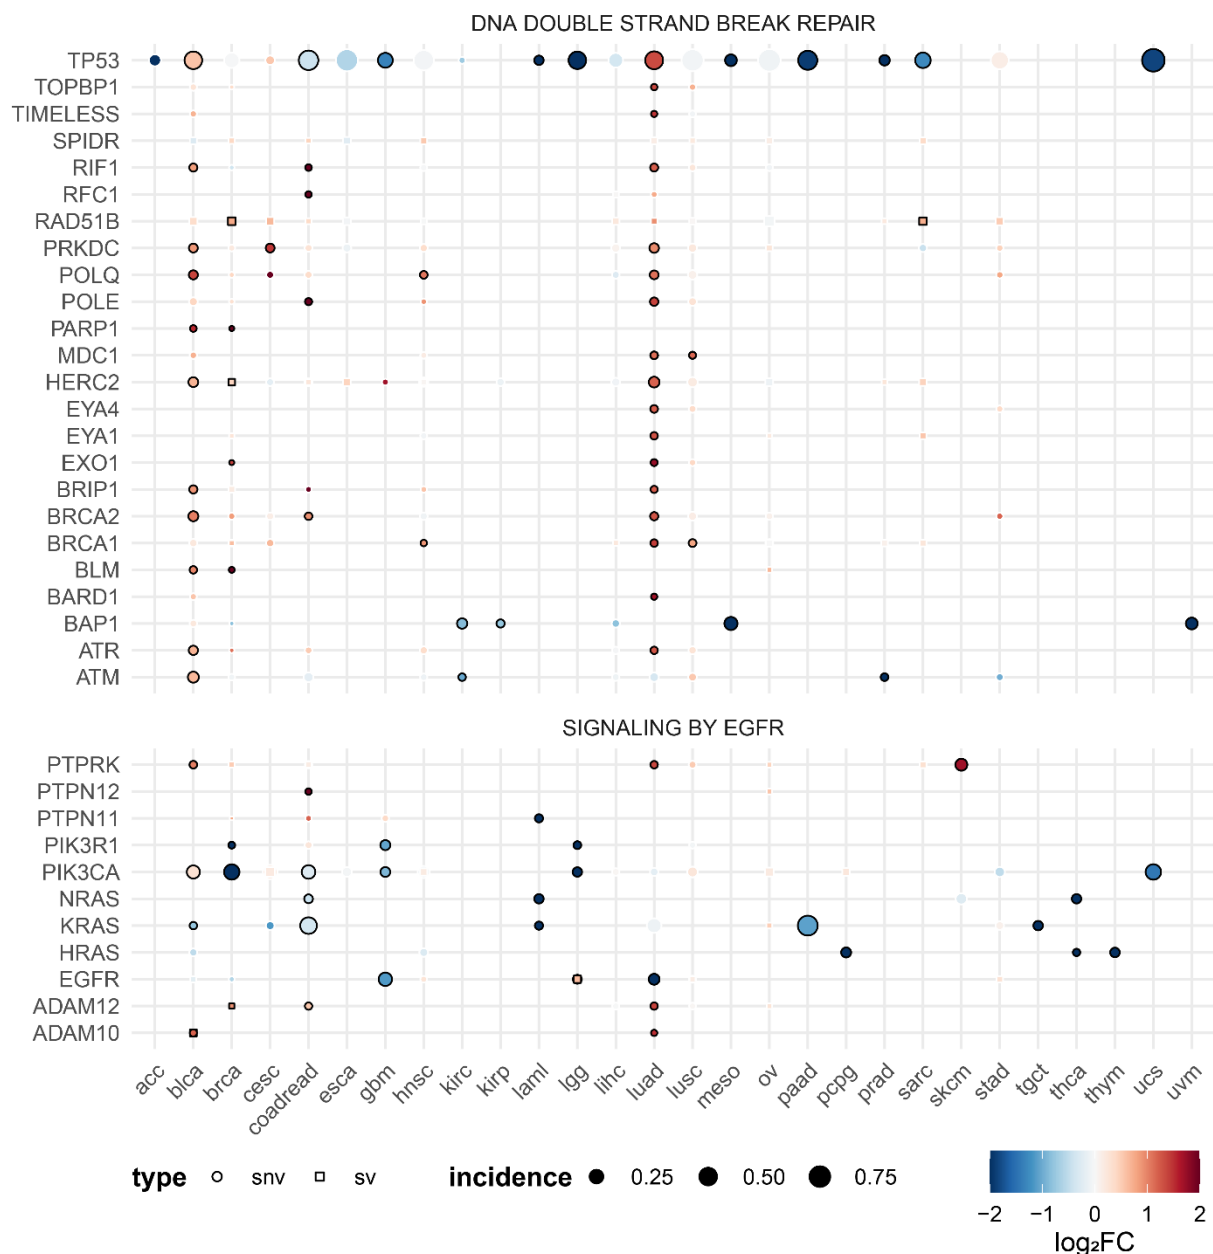

**Figure S21.** Pan-cancer representation of the change in TMB with respect to genomic alterations in genes related to DNA double-strand break repair and signaling by EGFR using the pathway representations of Reactome. Only genes with a significant association with changes in TMB in at least one cancer type are shown. Color represents the  $\log_2$  fold change of the TMB, dot size represents the fraction of samples with a genomic alteration in the corresponding gene, and the dot shape represents the type of genomic alteration affecting the gene. The border of the dots has been colored black when the analysis was significant with an adjusted p-value < 0.05. ACC: Acute Myeloid Leukemia, BLCA: Bladder Urothelial Carcinoma, BRCA: Breast invasive carcinoma, CESC: Cervical squamous cell carcinoma and endocervical adenocarcinoma, CHOL: Cholangiocarcinoma, COADREAD: Colon and Rectum adenocarcinoma, DLBC: Lymphoid Neoplasm Diffuse Large B-cell Lymphoma, ESCA: Esophageal carcinoma, GBM: Glioblastoma multiforme, HNSC: Head and Neck squamous cell carcinoma, KICH: Kidney Chromophobe, KIRC: Kidney renal clear cell carcinoma, KIRP: Kidney renal papillary cell carcinoma, LAML: Acute Myeloid Leukemia, LGG: Brain Lower Grade Glioma, LIHC: Liver hepatocellular carcinoma, LUAD: Lung adenocarcinoma, LUSC: Lung squamous cell carcinoma, MESO: Mesothelioma, OV: Ovarian serous cystadenocarcinoma, PAAD: Pancreatic adenocarcinoma, PCPG: Pheochromocytoma and Paraganglioma, PRAD: Prostate adenocarcinoma, SARC: Sarcoma, SKCM: Skin Cutaneous Melanoma, STAD: Stomach adenocarcinoma, TGCT: Testicular Germ Cell Tumors, THCA: Thyroid carcinoma, THYM: Thymoma, UCEC: Uterine Corpus Endometrial Carcinoma, UCS: Uterine Carcinosarcoma, UVM: Uveal Melanoma. BLCA: Bladder Urothelial Carcinoma, BOCA: Bone Cancer, BTCA: Biliary tract cancer, CLLE: Chronic Lymphocytic Leukemia, CMDI: Chronic Myeloid Disorders, DLBC: Lymphoid Neoplasm Diffuse Large B-cell Lymphoma, EOPC: Early Onset Prostate Cancer, ESAD: Esophageal Adenocarcinoma, GACA: Gastric Cancer, KICH: Kidney Chromophobe, LICA: Liver Cancer, LINC: Liver Cancer, LIRI: Liver Cancer, MALY: Malignant Lymphoma, MELA: Melanoma, ORCA: Oral Cancer OV: Ovarian serous cystadenocarcinoma, PACA: Pancreatic Cancer, PAEN: Pancreatic Cancer Endocrine neoplasms, PBCA: Pediatric Brain Cancer, RECA: Renal Cancer, UCEC: Uterine Corpus Endometrial Carcinoma.



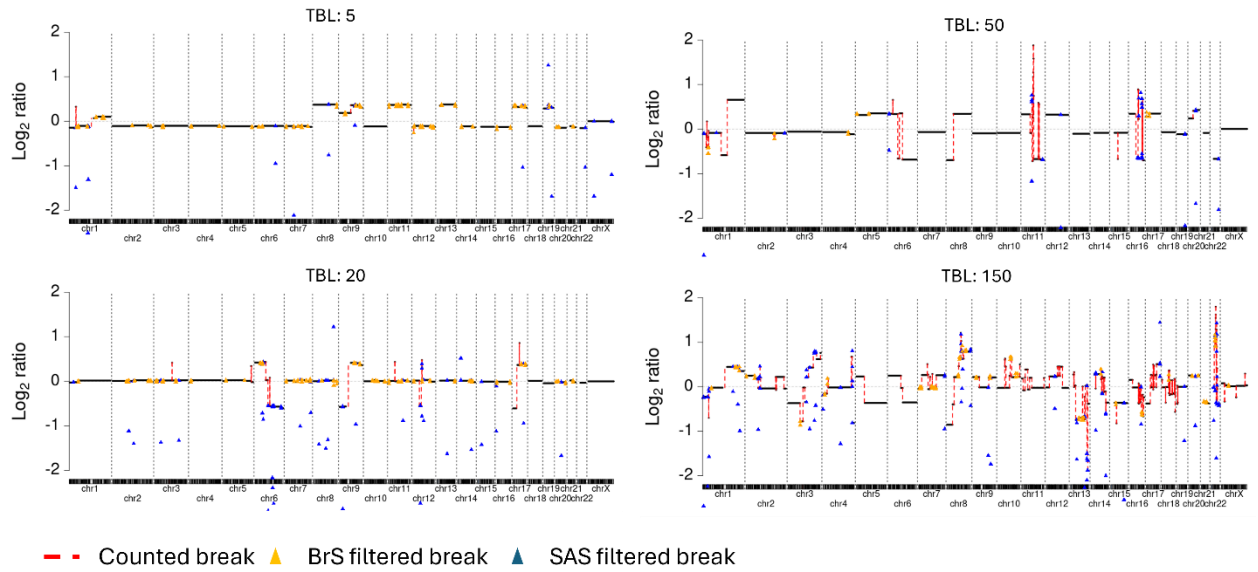

**Figure S22.** Four examples of segmented copy number profiles from TCGA-BRCA samples with TBL values ranging from 5 to 150. The y-axis represents the copy number as  $\log_2$  ratio, and the x-axis shows the chromosomes. The chromosome boundaries are marked by vertical dashed lines. The segments are drawn as black lines. Breakpoints that have been counted for the TBL are marked with red vertical lines. Breakpoints that have been filtered by the break size (BrS) or smallest adjacent segment size (SAS) filters have been marked with orange and blue triangles respectively.

**Table S1.** Tumor Break Load (TBL) calculated for three datasets: TCGA, PCAWG and CCLE with the sample ids and tumor type specified.

**Table S2.** Full genomic alteration association analysis results between the genomic instability measures and somatic alterations using TCGA data. The results are reported in three sheets separated on the genomic instability measures TMB, FGA and TBL. The column gene contains the gene names in Hugo gene symbols. Alteration\_type indicates the type of somatic alteration from single nucleotide variant (SNV), somatic copy number aberration (SCNA) and structural variant (SV). Cancer type is reported with the TCGA abbreviations. The p-values are reported from a two-sided Mann-Whitney U test with number\_cases and number\_controls indicating the sample size of the test. P-values are corrected for multiple testing correction using a FDR correction and reported as adjusted p-values. The log<sub>2</sub> foldchange between the mutated and WT groups in terms of genomic instability measure are reported in the column "log2fc". The absolute log<sub>2</sub> foldchange has been used as ranking measure to order the table. Adjusted p-values < 0.05 are deemed significant in this analysis.

**Table S3.** Full genomic alteration association analysis results between the genomic instability measures and somatic alterations using PCAWG data. The results are reported in three sheets separated on the genomic instability measures TMB, FGA and TBL. The column gene contains the gene names in Hugo gene symbols. Alteration\_type indicates the type of somatic alteration from single nucleotide variant (SNV), somatic copy number aberration (SCNA) and structural variant (SV). Cancer type is reported with the TCGA abbreviations. The p-values are reported from a two-sided Mann-Whitney U test with number\_cases and number\_controls indicating the sample size of the test. P-values are corrected for multiple testing correction using a FDR correction and reported as adjusted p-values. The log<sub>2</sub> foldchange between the mutated and WT groups in terms of genomic instability measure are reported in the column "log2fc". The absolute log<sub>2</sub> foldchange has been used as ranking measure to order the table. The ranking measure of genes that are not significant has been set to 0. Adjusted p-values < 0.05 are deemed significant in this analysis.

**Table S4.** Overview of the hazard rate (HR), their 95% confidence interval (95% CI) and the corresponding p-value for high TBL, FGA, or TMB compared to low TBL, FGA or TMB assessed using disease-free survival data from localized (stage I-III) MSS cancer data with known treatment information per cancer type using a multivariate Cox proportional hazards model corrected for age, sex, and tumor stages. Entries with a p-value < 0.05 are highlighted in bold. Hazard rates with an infinite confidence interval are exploded from the table and marked by the "-". Cancer type abbreviations are denoted with the TCGA study abbreviations as provided in [TCGA Study Abbreviations | NCI Genomic Data Commons \(cancer.gov\)](#).

| cancer type       | TMB treated DFS           |                 | FGA treated DFS            |                 | TBL treated DFS             |                 |
|-------------------|---------------------------|-----------------|----------------------------|-----------------|-----------------------------|-----------------|
|                   | HR (95% CI)               | p-value         | HR (95% CI)                | p-value         | HR (95% CI)                 | p-value         |
| BLCA (n = 49)     | 1.55 (0.31 - 7.71)        | 5.91E-01        | -                          | 9.98E-01        | 1.69 (0.5 - 5.7)            | 3.96E-01        |
| BRCA (n = 739)    | <b>0.54 (0.32 - 0.91)</b> | <b>2.02E-02</b> | <b>1.84 (1.1 - 3.1)</b>    | <b>2.11E-02</b> | <b>4.24 (1.33 - 13.59)</b>  | <b>1.49E-02</b> |
| COADREAD (n = 78) | 5.55 (0.68 - 45.15)       | 1.09E-01        | <b>5.51 (1.34 - 22.66)</b> | <b>1.79E-02</b> | <b>10.75 (1.21 - 95.59)</b> | <b>3.31E-02</b> |
| ESCA (n = 41)     | 1.87 (0.62 - 5.66)        | 2.68E-01        | 2.19 (0.59 - 8.06)         | 2.39E-01        | -                           | 9.99E-01        |
| HNSC (n = 61)     | 1.3 (0.34 - 5)            | 7.02E-01        | <b>0.29 (0.09 - 0.97)</b>  | <b>4.43E-02</b> | 0.18 (0.02 - 1.43)          | 1.05E-01        |
| LIHC (n = 36)     | 0.97 (0.4 - 2.35)         | 9.42E-01        | 4.17 (0.87 - 19.97)        | 7.43E-02        | 1.11 (0.49 - 2.53)          | 8.03E-01        |
| LUAD (n = 96)     | <b>0.52 (0.27 - 1)</b>    | <b>4.94E-02</b> | 0.66 (0.34 - 1.31)         | 2.35E-01        | 1.48 (0.72 - 3.06)          | 2.88E-01        |
| LUSC (n = 110)    | 0.56 (0.19 - 1.63)        | 2.85E-01        | 0.29 (0.07 - 1.24)         | 9.47E-02        | 0.6 (0.3 - 1.17)            | 1.35E-01        |
| PAAD (n = 47)     | 1.4 (0.48 - 4.08)         | 5.32E-01        | 2.12 (0.61 - 7.35)         | 2.38E-01        | <b>5.13 (1.39 - 18.91)</b>  | <b>1.41E-02</b> |
| STAD (n = 96)     | 0.67 (0.25 - 1.82)        | 4.35E-01        | 0.54 (0.24 - 1.2)          | 1.31E-01        | 0.51 (0.22 - 1.21)          | 1.27E-01        |
| THCA (n = 193)    | <b>3.4 (1.08 - 10.73)</b> | <b>3.64E-02</b> | <b>3.19 (1.15 - 8.86)</b>  | <b>2.60E-02</b> | 1.26 (0.48 - 3.36)          | 6.39E-01        |

**Table S5.** Overview of the hazard rate (HR), their 95% confidence interval (95% CI) and the corresponding p-value for high TBL, FGA or TMB compared to low TBL, FGA or TMB assessed using overall survival data per cancer type using a multivariate Cox proportional hazards model corrected for age, sex and tumor stages. Entries with a p-value < 0.05 are highlighted in bold. Hazard rates with an infinite confidence interval are exploded from the table and marked by the“-“. Cancer type abbreviations are denoted with the TCGA study abbreviations as provided in [TCGA Study Abbreviations](#) | [NCI Genomic Data Commons \(cancer.gov\)](#).

| cancer type        | TMB OS                     |                 | FGA OS                     |                 | TBL OS                     |                 |
|--------------------|----------------------------|-----------------|----------------------------|-----------------|----------------------------|-----------------|
|                    | HR (95% CI)                | p-value         | HR (95% CI)                | p-value         | HR (95% CI)                | p-value         |
| ACC (n = 90)       | <b>5 (2.09 - 11.95)</b>    | <b>3.00E-04</b> | <b>0.31 (0.13 - 0.74)</b>  | <b>8.35E-03</b> | <b>3.51 (1.63 - 7.57)</b>  | <b>1.37E-03</b> |
| BLCA (n = 412)     | <b>0.5 (0.37 - 0.7)</b>    | <b>3.38E-05</b> | 0.97 (0.71 - 1.32)         | 8.32E-01        | <b>0.58 (0.42 - 0.8)</b>   | <b>1.05E-03</b> |
| BRCA (n = 1095)    | 1.03 (0.74 - 1.43)         | 8.82E-01        | <b>1.44 (1.01 - 2.06)</b>  | <b>4.36E-02</b> | 2.1 (1.44 - 3.05)          | 1.08E-04        |
| CHOL (n = 36)      | 2.27 (0.77 - 6.66)         | 1.35E-01        | <b>3.51 (1.07 - 11.52)</b> | <b>3.86E-02</b> | -                          | 9.98E-01        |
| COADREAD (n = 614) | <b>1.51 (1.02 - 2.22)</b>  | <b>3.93E-02</b> | 1.19 (0.81 - 1.74)         | 3.75E-01        | <b>1.46 (1 - 2.11)</b>     | <b>4.85E-02</b> |
| ESCA (n = 184)     | 1.71 (0.97 - 3.02)         | 6.28E-02        | 1.85 (1 - 3.44)            | 5.05E-02        | 1.39 (0.82 - 2.37)         | 2.23E-01        |
| HNSC (n = 522)     | 1.33 (0.99 - 1.8)          | 6.08E-02        | 1.1 (0.81 - 1.49)          | 5.47E-01        | <b>1.42 (1.06 - 1.9)</b>   | <b>2.01E-02</b> |
| KICH (n = 66)      | <b>9.75 (1.92 - 49.38)</b> | <b>5.94E-03</b> | -                          | 9.94E-01        | 4.5 (0.83 - 24.38)         | 8.11E-02        |
| KIRC (n = 532)     | 1.07 (0.78 - 1.48)         | 6.67E-01        | 1.17 (0.86 - 1.61)         | 3.22E-01        | <b>1.92 (1.41 - 2.61)</b>  | <b>3.76E-05</b> |
| KIRP (n = 290)     | <b>0.2 (0.08 - 0.49)</b>   | <b>5.31E-04</b> | <b>2.13 (1.11 - 4.1)</b>   | <b>2.34E-02</b> | <b>3.05 (1.44 - 6.45)</b>  | <b>3.63E-03</b> |
| LIHC (n = 375)     | 1.4 (0.95 - 2.07)          | 8.96E-02        | <b>1.6 (1.1 - 2.34)</b>    | <b>1.51E-02</b> | 1.12 (0.76 - 1.64)         | 5.65E-01        |
| LUAD (n = 518)     | 0.92 (0.67 - 1.24)         | 5.72E-01        | 1.18 (0.85 - 1.63)         | 3.21E-01        | 1.1 (0.81 - 1.49)          | 5.52E-01        |
| LUSC (n = 503)     | 0.86 (0.64 - 1.16)         | 3.22E-01        | <b>0.73 (0.55 - 0.98)</b>  | <b>3.54E-02</b> | 0.79 (0.6 - 1.05)          | 1.01E-01        |
| MESO (n = 87)      | 1.48 (0.86 - 2.55)         | 1.61E-01        | <b>3.03 (1.8 - 5.12)</b>   | <b>3.32E-05</b> | <b>4.67 (2.47 - 8.83)</b>  | <b>2.16E-06</b> |
| PAAD (n = 184)     | 1.33 (0.85 - 2.08)         | 2.05E-01        | 1.47 (0.87 - 2.49)         | 1.53E-01        | <b>2.01 (1.31 - 3.09)</b>  | <b>1.42E-03</b> |
| SKCM (n = 104)     | <b>0.26 (0.1 - 0.65)</b>   | <b>3.98E-03</b> | 0.78 (0.34 - 1.79)         | 5.54E-01        | <b>3.35 (1.15 - 9.72)</b>  | <b>2.64E-02</b> |
| STAD (n = 442)     | <b>0.64 (0.46 - 0.88)</b>  | <b>6.87E-03</b> | 1.33 (0.96 - 1.85)         | 8.58E-02        | 1.08 (0.78 - 1.49)         | 6.54E-01        |
| THCA (n = 505)     | 1.69 (0.54 - 5.27)         | 3.64E-01        | 2.24 (0.74 - 6.75)         | 1.51E-01        | <b>5.38 (1.66 - 17.44)</b> | <b>5.03E-03</b> |
| UVM (n = 80)       | 1.67 (0.68 - 4.11)         | 2.61E-01        | <b>7.89 (2.26 - 27.5)</b>  | <b>1.19E-03</b> | 0.71 (0.29 - 1.74)         | 4.48E-01        |
